# Supplementary material for: Relative Validity of Food Intake in Each Meal Type and Overall Food Intake Derived Using the Meal-Based Diet History Questionnaire against the 4-Day Weighed Dietary Record in Japanese Adults
Source: MDPI journal article supplement (doi:10.3390/nu14153193), 2022-08-04
Supplement: s1 [file s1]

**Table S1.** List of food groups estimated from the Meal-based Diet History Questionnaire.

| <b>Tier 1 food group</b>  | <b>Tier 2 food group</b>                                                                                                                                                                                                                                                            |
|---------------------------|-------------------------------------------------------------------------------------------------------------------------------------------------------------------------------------------------------------------------------------------------------------------------------------|
| Rice                      | White rice; brown rice                                                                                                                                                                                                                                                              |
| Bread                     | White bread; wholegrain bread                                                                                                                                                                                                                                                       |
| Noodles                   | Wheat noodles; Chinese noodles; instant noodles; spaghetti; buckwheat noodles                                                                                                                                                                                                       |
| Miso soup                 | ---                                                                                                                                                                                                                                                                                 |
| Potatoes                  | ---                                                                                                                                                                                                                                                                                 |
| Pulses and nuts           | Soy milk; tofu (i.e., soybean curd); natto (i.e., fermented soybeans); tofu products; peanuts and nuts; all other pulses and nuts                                                                                                                                                   |
| Vegetables                | Edamame (i.e., immature soybeans) and peas; seaweeds; pumpkins; mushrooms; cabbage; cucumbers; bitter melon; burdock; radishes; onions; Chinese cabbage; tomatoes; eggplants; carrots; green peppers; broccoli; green leafy vegetables; bean sprouts; lettuce; all other vegetables |
| Pickled vegetables        | ---                                                                                                                                                                                                                                                                                 |
| Fruits                    | Strawberries; persimmons; citrus; kiwi fruit; watermelon; pears; bananas; grapes; melon; peaches; apples; all other fruit                                                                                                                                                           |
| Fish and shellfish        | Oily fish; red meat fish; squid and octopus; eel; shrimp and crab; shellfish; small fish with bones; fish eggs; dried fish; salmon; white meat fish; ground fish meat products; canned tuna; all other fish and shellfish                                                           |
| Meat                      | Liver; processed meat; beef; chicken; pork; all other meat                                                                                                                                                                                                                          |
| Eggs                      | ---                                                                                                                                                                                                                                                                                 |
| Dairy products            | Ice cream; cheese; low-fat milk; yogurt; full-fat milk; all other dairy products                                                                                                                                                                                                    |
| Confectioneries           | Candies, caramels, and chewing gum; Japanese bread with a sweet filling; snacks made from wheat flour; jellies; rice crackers; chocolates; biscuits and cookies; cakes; Japanese sweets                                                                                             |
| Fruit and vegetable juice | ---                                                                                                                                                                                                                                                                                 |
| Alcoholic beverages       | Beer; sake; shochu (i.e., Japanese distilled beverages); wine; whiskey and other spirits                                                                                                                                                                                            |
| Soft drinks               | ---                                                                                                                                                                                                                                                                                 |
| Green tea                 | ---                                                                                                                                                                                                                                                                                 |
| Barley tea                | ---                                                                                                                                                                                                                                                                                 |
| Oolong tea                | ---                                                                                                                                                                                                                                                                                 |
| Black tea                 | ---                                                                                                                                                                                                                                                                                 |
| Coffee                    | ---                                                                                                                                                                                                                                                                                 |
| Water                     | ---                                                                                                                                                                                                                                                                                 |
| Breakfast cereals         | ---                                                                                                                                                                                                                                                                                 |
| Seasonings <sup>1</sup>   | Sugar added to coffee and tea; salt for cooking; vegetable oils; sugar for cooking; salt for soup; soy sauce; jam for bread; fat spread for bread; mayonnaise and dressing                                                                                                          |

<sup>1</sup> Not assessed in this study.

**Table S2.** Mean estimates of daily intakes of Tier 1 food groups (in grams per day) derived from the 4-day weighed dietary record (DR) and those derived from the web version of the Meal-based Diet History Questionnaire (MDHQ) in 111 Japanese women, according to meal type <sup>1</sup>.

| Tier 1 food group                | Breakfast |             | Lunch   |            | Dinner   |            | Snacks    |              | Overall diet |              |
|----------------------------------|-----------|-------------|---------|------------|----------|------------|-----------|--------------|--------------|--------------|
|                                  | DR        | Web MDHQ    | DR      | Web MDHQ   | DR       | Web MDHQ   | DR        | Web MDHQ     | DR           | Web MDHQ     |
| Rice <sup>2</sup>                | 45 ± 61   | 47 ± 46     | 76 ± 51 | 78 ± 43    | 86 ± 57  | 85 ± 44    | 1 ± 4     | 0 ± 0*       | 208 ± 110    | 210 ± 85     |
| Bread <sup>2</sup>               | 24 ± 26   | 25 ± 22     | 9 ± 17  | 8 ± 11     | 1 ± 5    | 2 ± 6      | 1 ± 4     | 0 ± 0**      | 35 ± 30      | 35 ± 27      |
| Noodles <sup>2</sup>             | 2 ± 12    | 1 ± 3       | 54 ± 56 | 35 ± 32*** | 13 ± 24  | 20 ± 17**  | 0 ± 1     | 0 ± 0        | 69 ± 60      | 55 ± 36*     |
| Miso soup <sup>2</sup>           | 35 ± 58   | 46 ± 59**   | 17 ± 35 | 28 ± 43**  | 55 ± 57  | 68 ± 58**  | 0 ± 4     | 0 ± 0        | 108 ± 86     | 141 ± 100*** |
| Potatoes <sup>2</sup>            | 3 ± 5     | 5 ± 7**     | 10 ± 14 | 7 ± 7**    | 17 ± 17  | 15 ± 9     | 1 ± 4     | 0 ± 0*       | 32 ± 24      | 26 ± 17*     |
| Pulses and nuts <sup>2</sup>     | 17 ± 30   | 12 ± 13     | 11 ± 21 | 7 ± 7      | 26 ± 27  | 23 ± 14    | 5 ± 16    | 0 ± 0**      | 59 ± 55      | 42 ± 24***   |
| Vegetables <sup>2</sup>          | 28 ± 39   | 30 ± 32     | 59 ± 44 | 41 ± 32*** | 124 ± 59 | 99 ± 45*** | 2 ± 8     | 0 ± 0**      | 213 ± 108    | 169 ± 75***  |
| Pickled vegetables <sup>2</sup>  | 1 ± 4     | 3 ± 5***    | 2 ± 4   | 3 ± 5      | 3 ± 9    | 6 ± 7**    | 0 ± 0     | 0 ± 0        | 6 ± 12       | 12 ± 13***   |
| Fruit                            | 27 ± 36   | 19 ± 25**   | 15 ± 25 | 10 ± 14**  | 12 ± 20  | 16 ± 18*   | 14 ± 28   | 15 ± 24      | 67 ± 66      | 60 ± 49      |
| Fish and shellfish <sup>2</sup>  | 5 ± 11    | 3 ± 5**     | 12 ± 18 | 6 ± 7***   | 30 ± 22  | 22 ± 11*** | 0 ± 3     | 0 ± 0        | 48 ± 32      | 31 ± 17***   |
| Meat <sup>2</sup>                | 7 ± 10    | 7 ± 7       | 25 ± 19 | 15 ± 11*** | 52 ± 30  | 37 ± 15*** | 0 ± 2     | 0 ± 0*       | 84 ± 39      | 59 ± 24***   |
| Eggs <sup>2</sup>                | 13 ± 16   | 12 ± 11     | 12 ± 12 | 8 ± 7***   | 10 ± 10  | 7 ± 5**    | 1 ± 2     | 0 ± 0**      | 35 ± 22      | 27 ± 15***   |
| Dairy products                   | 64 ± 77   | 62 ± 53     | 21 ± 42 | 15 ± 22    | 9 ± 15   | 12 ± 18    | 37 ± 54   | 21 ± 31***   | 130 ± 115    | 111 ± 80*    |
| Confectioneries                  | 6 ± 14    | 6 ± 11      | 9 ± 15  | 7 ± 12     | 2 ± 6    | 4 ± 9      | 17 ± 18   | 45 ± 34***   | 34 ± 30      | 62 ± 44***   |
| Fruit and vegetable juice        | 4 ± 20    | 8 ± 29      | 5 ± 22  | 5 ± 16     | 2 ± 9    | 4 ± 17**   | 6 ± 25    | 12 ± 39      | 17 ± 41      | 29 ± 59*     |
| Alcoholic beverages <sup>3</sup> | 0 ± 0     | 0 ± 0**     | 1 ± 1   | 2 ± 12     | 73 ± 169 | 67 ± 151   | 18 ± 69   | 21 ± 67      | 92 ± 201     | 89 ± 188     |
| Soft drinks                      | 1 ± 8     | 6 ± 17*     | 6 ± 22  | 7 ± 20     | 3 ± 16   | 5 ± 18     | 33 ± 55   | 33 ± 58      | 43 ± 67      | 51 ± 95      |
| Green tea                        | 24 ± 55   | 48 ± 70***  | 42 ± 56 | 57 ± 71*   | 40 ± 73  | 52 ± 78    | 81 ± 155  | 109 ± 143    | 186 ± 253    | 267 ± 303**  |
| Barley tea                       | 28 ± 70   | 44 ± 65*    | 46 ± 75 | 68 ± 79**  | 55 ± 95  | 79 ± 86**  | 115 ± 208 | 140 ± 168    | 244 ± 375    | 331 ± 355**  |
| Oolong tea                       | 0 ± 2     | 5 ± 23*     | 5 ± 18  | 8 ± 32     | 6 ± 35   | 11 ± 39    | 12 ± 52   | 24 ± 85      | 23 ± 83      | 48 ± 150*    |
| Black tea                        | 13 ± 42   | 14 ± 39     | 9 ± 25  | 9 ± 27     | 3 ± 16   | 8 ± 30     | 25 ± 66   | 40 ± 86*     | 50 ± 102     | 71 ± 155*    |
| Coffee                           | 85 ± 95   | 118 ± 90*** | 29 ± 52 | 55 ± 65*** | 7 ± 21   | 22 ± 49*** | 116 ± 129 | 152 ± 144*** | 236 ± 202    | 346 ± 262*** |
| Water                            | 18 ± 36   | 73 ± 79***  | 10 ± 23 | 67 ± 84*** | 8 ± 21   | 61 ± 83*** | 156 ± 275 | 200 ± 197    | 191 ± 294    | 400 ± 390*** |
| Breakfast cereals <sup>4</sup>   | 1 ± 4     | 3 ± 9*      | 0 ± 2   | 0 ± 0      | 0 ± 3    | 0 ± 0      | 0 ± 0     | 0 ± 0        | 2 ± 5        | 3 ± 9        |

<sup>1</sup> Values are means ± standard deviations. The values derived from the MDHQ were compared with those derived from the DR using the paired *t*-test: \* *p* < 0.05, \*\* *p* < 0.01, \*\*\* *p* < 0.001.

<sup>2</sup> Not assessed for snacks in the MDHQ; the intake for snacks was 0 g/day for all participants. <sup>3</sup> Not assessed for breakfast in the MDHQ; the intake for breakfast was 0 g/day for all participants. <sup>4</sup> Only assessed for breakfast in the MDHQ; the intake for all other eating occasions was 0 g/day for all participants.

**Table S3.** Mean estimates of daily intakes of Tier 1 food groups (in grams per day) derived from the 4-day weighed dietary record (DR) and those derived from the web version of the Meal-based Diet History Questionnaire (MDHQ) in 111 Japanese men, according to meal type <sup>1</sup>.

| Tier 1 food group                | Breakfast |             | Lunch    |            | Dinner    |             | Snacks    |            | Overall diet |              |
|----------------------------------|-----------|-------------|----------|------------|-----------|-------------|-----------|------------|--------------|--------------|
|                                  | DR        | Web MDHQ    | DR       | Web MDHQ   | DR        | Web MDHQ    | DR        | Web MDHQ   | DR           | Web MDHQ     |
| Rice <sup>2</sup>                | 62 ± 73   | 60 ± 62     | 122 ± 79 | 124 ± 67   | 138 ± 87  | 126 ± 61    | 0 ± 2     | 0 ± 0      | 322 ± 142    | 310 ± 103    |
| Bread <sup>2</sup>               | 24 ± 29   | 27 ± 29     | 9 ± 18   | 11 ± 20    | 1 ± 5     | 1 ± 4       | 2 ± 6     | 0 ± 0**    | 36 ± 34      | 40 ± 36      |
| Noodles <sup>2</sup>             | 4 ± 20    | 2 ± 5       | 81 ± 75  | 42 ± 40*** | 20 ± 36   | 27 ± 26     | 1 ± 4     | 0 ± 0      | 106 ± 82     | 70 ± 51***   |
| Miso soup <sup>2</sup>           | 44 ± 67   | 44 ± 61     | 14 ± 31  | 25 ± 42**  | 60 ± 68   | 64 ± 58     | 0 ± 0     | 0 ± 0      | 119 ± 102    | 133 ± 102    |
| Potatoes <sup>2</sup>            | 4 ± 8     | 4 ± 8       | 10 ± 14  | 5 ± 6***   | 22 ± 25   | 16 ± 9*     | 1 ± 2     | 0 ± 0**    | 36 ± 32      | 25 ± 17***   |
| Pulses and nuts <sup>2</sup>     | 15 ± 27   | 9 ± 12**    | 6 ± 15   | 5 ± 7      | 31 ± 27   | 20 ± 13***  | 1 ± 3     | 0 ± 0***   | 52 ± 48      | 34 ± 22***   |
| Vegetables <sup>2</sup>          | 31 ± 49   | 25 ± 31     | 56 ± 40  | 37 ± 33*** | 153 ± 77  | 107 ± 55*** | 2 ± 10    | 0 ± 0      | 241 ± 118    | 169 ± 84***  |
| Pickled vegetables <sup>2</sup>  | 1 ± 4     | 3 ± 6*      | 3 ± 5    | 4 ± 7*     | 3 ± 10    | 5 ± 7       | 0 ± 1     | 0 ± 0      | 8 ± 15       | 12 ± 13*     |
| Fruit                            | 23 ± 40   | 15 ± 25**   | 9 ± 21   | 7 ± 14     | 10 ± 16   | 12 ± 19     | 10 ± 34   | 12 ± 23    | 51 ± 62      | 46 ± 53      |
| Fish and shellfish <sup>2</sup>  | 5 ± 11    | 3 ± 5**     | 13 ± 16  | 10 ± 10    | 43 ± 33   | 28 ± 13***  | 1 ± 5     | 0 ± 0*     | 62 ± 40      | 41 ± 20***   |
| Meat <sup>2</sup>                | 11 ± 15   | 8 ± 8*      | 32 ± 22  | 22 ± 12*** | 72 ± 40   | 42 ± 15***  | 1 ± 2     | 0 ± 0**    | 115 ± 47     | 71 ± 25***   |
| Eggs <sup>2</sup>                | 17 ± 18   | 12 ± 13***  | 16 ± 16  | 10 ± 9***  | 11 ± 12   | 7 ± 5***    | 1 ± 2     | 0 ± 0**    | 45 ± 25      | 29 ± 17***   |
| Dairy products                   | 54 ± 85   | 42 ± 54     | 14 ± 38  | 10 ± 21    | 13 ± 30   | 7 ± 11*     | 26 ± 47   | 12 ± 26**  | 107 ± 122    | 71 ± 71***   |
| Confectioneries                  | 9 ± 18    | 5 ± 12**    | 7 ± 16   | 7 ± 14     | 3 ± 8     | 6 ± 15*     | 15 ± 21   | 40 ± 40*** | 35 ± 35      | 58 ± 52***   |
| Fruit and vegetable juice        | 8 ± 34    | 18 ± 56*    | 4 ± 18   | 5 ± 20     | 4 ± 31    | 10 ± 41*    | 4 ± 27    | 9 ± 32     | 20 ± 68      | 41 ± 89***   |
| Alcoholic beverages <sup>3</sup> | 1 ± 3     | 0 ± 0       | 10 ± 47  | 10 ± 37    | 175 ± 304 | 216 ± 321   | 77 ± 207  | 70 ± 153   | 262 ± 394    | 297 ± 385    |
| Soft drinks                      | 2 ± 13    | 6 ± 21      | 11 ± 45  | 9 ± 26     | 8 ± 55    | 7 ± 23      | 71 ± 140  | 52 ± 86    | 92 ± 193     | 73 ± 119     |
| Green tea                        | 30 ± 71   | 47 ± 72**   | 47 ± 70  | 67 ± 88*   | 30 ± 69   | 41 ± 75     | 96 ± 178  | 104 ± 169  | 204 ± 284    | 258 ± 328    |
| Barley tea                       | 23 ± 52   | 37 ± 69*    | 65 ± 118 | 67 ± 89    | 47 ± 86   | 62 ± 84     | 106 ± 219 | 131 ± 193  | 240 ± 354    | 296 ± 376    |
| Oolong tea                       | 2 ± 14    | 13 ± 45**   | 10 ± 39  | 15 ± 49    | 10 ± 52   | 17 ± 56     | 24 ± 111  | 36 ± 120   | 46 ± 193     | 81 ± 237     |
| Black tea                        | 3 ± 15    | 10 ± 41*    | 2 ± 11   | 7 ± 29*    | 2 ± 13    | 6 ± 31      | 16 ± 53   | 20 ± 73    | 24 ± 66      | 42 ± 141     |
| Coffee                           | 82 ± 98   | 110 ± 94*** | 27 ± 47  | 58 ± 81*** | 8 ± 28    | 18 ± 45**   | 163 ± 218 | 187 ± 192  | 280 ± 273    | 372 ± 297*** |
| Water                            | 18 ± 42   | 67 ± 86***  | 19 ± 43  | 85 ± 98*** | 12 ± 40   | 89 ± 98***  | 181 ± 397 | 200 ± 218  | 229 ± 426    | 441 ± 410*** |
| Breakfast cereals <sup>4</sup>   | 1 ± 5     | 2 ± 10      | 0 ± 0    | 0 ± 0      | 0 ± 0     | 0 ± 0       | 0 ± 0     | 0 ± 0      | 1 ± 5        | 2 ± 10       |

<sup>1</sup> Values are means ± standard deviations. The values derived from the MDHQ were compared with those derived from the DR using the paired *t*-test: \* *p* < 0.05, \*\* *p* < 0.01, \*\*\* *p* < 0.001.

<sup>2</sup> Not assessed for snacks in the MDHQ; the intake for snacks was 0 g/day for all participants. <sup>3</sup> Not assessed for breakfast in the MDHQ; the intake for breakfast was 0 g/day for all participants. <sup>4</sup> Only assessed for breakfast in the MDHQ; the intake for all other eating occasions was 0 g/day for all participants.

**Table S4.** Bland–Altman analysis for estimates of daily intakes of Tier 1 food groups (in grams per day) derived from the 4-day weighed dietary record and those derived from the web version of the Meal-based Diet History Questionnaire (MDHQ) in 111 Japanese women, according to meal type <sup>1</sup>.

| Tier 1 food group                | Breakfast       |                     |               | Lunch           |                     |               | Dinner          |                     |               | Snacks          |                     |               | Overall diet    |                     |               |
|----------------------------------|-----------------|---------------------|---------------|-----------------|---------------------|---------------|-----------------|---------------------|---------------|-----------------|---------------------|---------------|-----------------|---------------------|---------------|
|                                  | Mean difference | Limits of agreement | Slope of bias | Mean difference | Limits of agreement | Slope of bias | Mean difference | Limits of agreement | Slope of bias | Mean difference | Limits of agreement | Slope of bias | Mean difference | Limits of agreement | Slope of bias |
| Rice <sup>2</sup>                | 1               | -84, 87             | -0.34***      | 2               | -97, 102            | -0.24*        | -1              | -92, 89             | -0.30**       | -1              | -9, 7               | ---           | 2               | -168, 172           | -0.31***      |
| Bread <sup>2</sup>               | 1               | -48, 50             | -0.20         | -1              | -37, 35             | -0.78***      | 0               | -12, 13             | 0.40**        | -1              | -8, 6               | ---           | -1              | -67, 66             | -0.20         |
| Noodles <sup>2</sup>             | -1              | -25, 22             | -1.54***      | -19             | -118, 80            | -0.74***      | 7               | -47, 61             | -0.60***      | 0               | -3, 3               | ---           | -14             | -127, 100           | -0.73***      |
| Miso soup <sup>2</sup>           | 11              | -59, 81             | 0.02          | 10              | -65, 85             | 0.27*         | 13              | -82, 108            | 0.01          | 0               | -7, 6               | ---           | 33              | -116, 183           | 0.17*         |
| Potatoes <sup>2</sup>            | 2               | -11, 15             | 0.34**        | -4              | -33, 25             | -1.13***      | -2              | -37, 33             | -0.97***      | -1              | -8, 6               | ---           | -5              | -55, 45             | -0.51***      |
| Pulses and nuts <sup>2</sup>     | -5              | -59, 49             | -1.05***      | -4              | -45, 38             | -1.44***      | -4              | -58, 51             | -0.99***      | -5              | -37, 27             | ---           | -17             | -116, 82            | -1.04***      |
| Vegetables <sup>2</sup>          | 2               | -65, 68             | -0.25*        | -19             | -111, 74            | -0.49***      | -25             | -150, 100           | -0.42**       | -2              | -17, 13             | ---           | -44             | -255, 167           | -0.53***      |
| Pickled vegetables               | 2               | -8, 12              | 0.54***       | 1               | -12, 14             | 0.34          | 3               | -18, 24             | -0.38*        | 0               | 0, 0                | ---           | 5               | -23, 33             | 0.12          |
| Fruit                            | -8              | -67, 51             | -0.46***      | -5              | -42, 32             | -0.66***      | 4               | -36, 44             | -0.17         | 1               | -61, 64             | -0.26         | -8              | -125, 110           | -0.41***      |
| Fish and shellfish <sup>2</sup>  | -2              | -19, 15             | -0.88***      | -6              | -38, 26             | -1.11***      | -8              | -49, 33             | -0.90***      | 0               | -6, 5               | ---           | -16             | -73, 40             | -0.85***      |
| Meat <sup>2</sup>                | 0               | -20, 20             | -0.60***      | -10             | -48, 29             | -0.83***      | -15             | -77, 47             | -1.13***      | 0               | -4, 4               | ---           | -25             | -103, 54            | -0.72***      |
| Eggs <sup>2</sup>                | -1              | -27, 25             | -0.49***      | -4              | -27, 19             | -0.83***      | -3              | -22, 16             | -0.97***      | -1              | -5, 4               | ---           | -9              | -48, 30             | -0.53***      |
| Dairy products                   | -1              | -126, 124           | -0.48***      | -6              | -79, 67             | -0.81***      | 3               | -35, 41             | 0.29*         | -16             | -103, 72            | -0.66***      | -20             | -190, 150           | -0.44***      |
| Confectioneries                  | 0               | -29, 29             | -0.37**       | -1              | -33, 30             | -0.35*        | 2               | -19, 22             | 0.82***       | 28              | -31, 87             | 0.78***       | 28              | -51, 107            | 0.51***       |
| Fruit and vegetable juice        | 4               | -47, 55             | 0.45***       | 0               | -32, 32             | -0.36***      | 2               | -16, 21             | 0.65***       | 6               | -55, 67             | 0.55***       | 12              | -90, 115            | 0.49***       |
| Alcoholic beverages <sup>3</sup> | 0               | -1, 1               | ---           | 1               | -24, 26             | 1.98***       | -6              | -206, 193           | -0.13*        | 3               | -135, 140           | -0.04         | -3              | -211, 205           | -0.07         |
| Soft drinks                      | 5               | -32, 41             | 1.31***       | 2               | -40, 43             | -0.15         | 2               | -45, 50             | 0.23          | 0               | -112, 112           | 0.07          | 8               | -159, 176           | 0.46***       |
| Green tea                        | 25              | -95, 144            | 0.31**        | 15              | -114, 145           | 0.32**        | 12              | -124, 148           | 0.08          | 28              | -274, 330           | -0.11         | 81              | -410, 572           | 0.22*         |
| Barley tea                       | 16              | -119, 151           | -0.11         | 22              | -111, 154           | 0.07          | 24              | -146, 193           | -0.12         | 25              | -350, 400           | -0.28*        | 87              | -523, 696           | -0.07         |
| Oolong tea                       | 4               | -41, 50             | 1.98***       | 3               | -55, 61             | 0.78***       | 5               | -62, 72             | 0.12          | 12              | -149, 174           | 0.71***       | 25              | -231, 281           | 0.75***       |
| Black tea                        | 1               | -60, 62             | -0.08         | 0               | -60, 60             | 0.12          | 5               | -50, 60             | 0.86***       | 15              | -127, 156           | 0.33***       | 21              | -194, 235           | 0.47***       |
| Coffee                           | 33              | -112, 178           | -0.07         | 26              | -90, 142            | 0.29**        | 15              | -70, 99             | 1.02***       | 36              | -174, 246           | 0.12          | 110             | -229, 448           | 0.29***       |
| Water                            | 54              | -97, 205            | 1.07***       | 57              | -105, 219           | 1.55***       | 53              | -112, 218           | 1.70***       | 45              | -445, 535           | -0.44***      | 209             | -457, 876           | 0.36***       |
| Breakfast cereals <sup>4</sup>   | 2               | -11, 15             | 0.80***       | 0               | -4, 3               | ---           | 0               | -5, 5               | ---           | 0               | 0, 0                | ---           | 1               | -13, 15             | 0.67***       |

<sup>1</sup> Mean difference was calculated as mean of difference between the two methods (MDHQ minus DR). Limits of agreement were calculated as the mean difference  $\pm$  1.96 standard deviation. Slope of bias (regression coefficient) was calculated by using a linear regression analysis, in which the difference between the two methods (MDHQ minus DR) was the dependent variable and the average of the two methods was the independent variable; positive values indicate that the difference increases as the average intake increases, while negative values indicate that the difference decreases as the average intake increases (\*  $p < 0.05$ , \*\*  $p < 0.01$ , \*\*\*  $p < 0.001$ ). For the food groups the intake of which was not assessed in the MDHQ and thus the intake value was 0 g/day for all participants, the slope of bias was not calculated. <sup>2</sup> Not assessed for snacks in the MDHQ. <sup>3</sup> Not assessed for breakfast in the MDHQ. <sup>4</sup> Only assessed for breakfast in the MDHQ.

**Table S5.** Bland–Altman analysis for estimates of daily intakes of Tier 1 food groups (in grams per day) derived from the 4-day weighed dietary record (DR) and those derived from the web version of the Meal-based Diet History Questionnaire (MDHQ) in 111 Japanese men, according to meal type <sup>1</sup>.

| Tier 1 food group                | Breakfast       |                     |               | Lunch           |                     |               | Dinner          |                     |               | Snacks          |                     |               | Overall diet    |                     |               |
|----------------------------------|-----------------|---------------------|---------------|-----------------|---------------------|---------------|-----------------|---------------------|---------------|-----------------|---------------------|---------------|-----------------|---------------------|---------------|
|                                  | Mean difference | Limits of agreement | Slope of bias | Mean difference | Limits of agreement | Slope of bias | Mean difference | Limits of agreement | Slope of bias | Mean difference | Limits of agreement | Slope of bias | Mean difference | Limits of agreement | Slope of bias |
| Rice <sup>2</sup>                | −2              | −98, 95             | −0.18*        | 2               | −131, 135           | −0.21*        | −12             | −144, 120           | −0.42***      | 0               | −5, 4               | ---           | −12             | −240, 216           | −0.40***      |
| Bread <sup>2</sup>               | 4               | −40, 47             | 0.03          | 3               | −43, 48             | 0.18          | 0               | −12, 12             | −0.16         | −2              | −14, 10             | ---           | 4               | −62, 70             | 0.09          |
| Noodles <sup>2</sup>             | −3              | −38, 32             | −1.41***      | −39             | −171, 94            | −0.82***      | 6               | −76, 89             | −0.59***      | −1              | −9, 8               | ---           | −36             | −199, 128           | −0.70***      |
| Miso soup <sup>2</sup>           | 0               | −85, 86             | −0.1          | 11              | −70, 92             | 0.45***       | 4               | −98, 105            | −0.18*        | 0               | 0, 0                | ---           | 14              | −164, 193           | 0.00          |
| Potatoes <sup>2</sup>            | 0               | −17, 17             | 0.08          | −6              | −34, 22             | −1.31***      | −5              | −55, 44             | −1.38***      | −1              | −4, 3               | ---           | −11             | −76, 54             | −0.96***      |
| Pulses and nuts <sup>2</sup>     | −6              | −50, 38             | −0.92***      | 0               | −29, 28             | −1.09***      | −11             | −66, 43             | −1.11***      | −1              | −8, 6               | ---           | −19             | −102, 65            | −0.96***      |
| Vegetables <sup>2</sup>          | −6              | −84, 72             | −0.55***      | −19             | −103, 65            | −0.29*        | −46             | −208, 116           | −0.53***      | −2              | −21, 17             | ---           | −73             | −297, 151           | −0.47***      |
| Pickled vegetables               | 1               | −10, 13             | 0.57***       | 2               | −13, 17             | 0.5**         | 2               | −21, 24             | −0.73***      | 0               | −3, 2               | ---           | 4               | −30, 39             | −0.2          |
| Fruit                            | −8              | −60, 44             | −0.52***      | −2              | −38, 34             | −0.56***      | 3               | −39, 44             | 0.20          | 2               | −65, 69             | −0.59***      | −6              | −105, 94            | 0.0002*       |
| Fish and shellfish <sup>2</sup>  | −3              | −20, 15             | −0.99***      | −3              | −37, 31             | −0.70***      | −14             | −79, 50             | −1.30***      | −1              | −11, 9              | ---           | −21             | −100, 58            | −1.03***      |
| Meat <sup>2</sup>                | −3              | −28, 22             | −0.73***      | −10             | −53, 32             | −0.82***      | −30             | −110, 50            | −1.34***      | −1              | −5, 4               | ---           | −44             | −139, 51            | −0.97***      |
| Eggs <sup>2</sup>                | −5              | −32, 22             | −0.4***       | −6              | −35, 23             | −0.80***      | −4              | −26, 18             | −1.11***      | −1              | −5, 4               | ---           | −15             | −55, 24             | −0.47***      |
| Dairy products                   | −12             | −140, 117           | −0.53***      | −4              | −67, 59             | −0.74***      | −6              | −68, 55             | −1.45***      | −14             | −99, 72             | −0.81***      | −36             | −220, 149           | −0.63***      |
| Confectioneries                  | −5              | −40, 31             | −0.6***       | 0               | −35, 35             | −0.23         | 3               | −31, 37             | 1.08***       | 25              | −51, 102            | 0.88***       | 24              | −82, 129            | 0.59***       |
| Fruit and vegetable juice        | 10              | −71, 91             | 0.58***       | 1               | −33, 35             | 0.14          | 6               | −51, 63             | 0.33***       | 5               | −71, 80             | 0.28          | 21              | −106, 148           | 0.31***       |
| Alcoholic beverages <sup>3</sup> | −1              | −7, 5               | ---           | 0               | −78, 78             | −0.31**       | 41              | −407, 490           | 0.06          | −6              | −334, 321           | −0.37**       | 35              | −362, 431           | −0.02         |
| Soft drinks                      | 3               | −39, 45             | 0.74***       | −2              | −76, 73             | −0.67***      | −1              | −117, 115           | −1.36***      | −19             | −273, 234           | −0.66***      | −18             | −350, 314           | −0.63***      |
| Green tea                        | 17              | −95, 129            | 0.02          | 20              | −167, 206           | 0.34*         | 10              | −147, 168           | 0.12          | 7               | −368, 383           | −0.07         | 54              | −534, 643           | 0.19          |
| Barley tea                       | 14              | −125, 153           | 0.43**        | 2               | −221, 225           | −0.39**       | 15              | −167, 196           | −0.05         | 25              | −366, 416           | −0.16         | 56              | −584, 696           | 0.08          |
| Oolong tea                       | 10              | −69, 89             | 1.3***        | 6               | −84, 96             | 0.29*         | 7               | −87, 100            | 0.08          | 12              | −232, 255           | 0.11          | 35              | −366, 435           | 0.26*         |
| Black tea                        | 6               | −58, 70             | 1.06***       | 5               | −43, 52             | 1.08***       | 3               | −51, 58             | 1.04***       | 4               | −148, 157           | 0.51***       | 19              | −232, 269           | 0.97***       |
| Coffee                           | 27              | −130, 184           | −0.05         | 31              | −94, 156            | 0.64***       | 10              | −68, 88             | 0.61***       | 23              | −302, 348           | −0.15         | 92              | −313, 498           | 0.10          |
| Water                            | 49              | −129, 227           | 1.1***        | 66              | −127, 259           | 1.18***       | 77              | −121, 274           | 1.31***       | 20              | −725, 764           | −0.83***      | 212             | −624, 1047          | −0.05         |
| Breakfast cereals <sup>4</sup>   | 1               | −13, 15             | 0.79***       | 0               | 0, 0                | ---           | 0               | 0, 0                | ---           | 0               | 0, 0                | ---           | 1               | −13, 15             | 0.79***       |

<sup>1</sup> Mean difference was calculated as mean of difference between the two methods (MDHQ minus DR). Limits of agreement were calculated as the mean difference  $\pm$  1.96 standard deviation. Slope of bias (regression coefficient) was calculated by using a linear regression analysis, in which the difference between the two methods (MDHQ minus DR) was the dependent variable and the average of the two methods was the independent variable; positive values indicate that the difference increases as the average intake increases, while negative values indicate that the difference decreases as the average intake increases (\*  $p < 0.05$ , \*\*  $p < 0.01$ , \*\*\*  $p < 0.001$ ). For the food groups the intake of which was not assessed in the MDHQ and thus the intake value was 0 g/day for all participants, the slope of bias was not calculated. <sup>2</sup> Not assessed for snacks in the MDHQ. <sup>3</sup> Not assessed for breakfast in the MDHQ. <sup>4</sup> Only assessed for breakfast in the MDHQ.

**Table S6.** Mean estimates of overall intakes of Tier 2 food groups (in grams per day) derived from the 4-day weighed dietary record (DR) and those derived from the web version of the Meal-based Diet History Questionnaire (MDHQ) and Bland–Altman analysis for these estimates in 111 Japanese women and 111 Japanese men <sup>1</sup>.

| Tier 2 food group                          | Women     |            |                                    |                     |               | Men       |            |                                    |                     |               |
|--------------------------------------------|-----------|------------|------------------------------------|---------------------|---------------|-----------|------------|------------------------------------|---------------------|---------------|
|                                            | DR        | Web MDHQ   | Bland–Altman analysis <sup>2</sup> |                     |               | DR        | Web MDHQ   | Bland–Altman analysis <sup>2</sup> |                     |               |
|                                            |           |            | Mean difference                    | Limits of agreement | Slope of bias |           |            | Mean difference                    | Limits of agreement | Slope of bias |
| Rice                                       |           |            |                                    |                     |               |           |            |                                    |                     |               |
| White rice                                 | 206 ± 110 | 202 ± 84   | −4                                 | −179, 171           | −0.34***      | 320 ± 144 | 293 ± 106* | −27                                | −265, 211           | −0.39***      |
| Brown rice                                 | 3 ± 18    | 8 ± 19**   | 6                                  | −31, 42             | 0.10          | 2 ± 14    | 17 ± 44*** | 15                                 | −62, 92             | 1.31***       |
| Bread                                      |           |            |                                    |                     |               |           |            |                                    |                     |               |
| White bread                                | 35 ± 31   | 29 ± 24    | −6                                 | −69, 58             | −0.37**       | 35 ± 34   | 35 ± 32    | 0                                  | −65, 64             | −0.09         |
| Wholegrain bread                           | 1 ± 5     | 6 ± 9***   | 5                                  | −12, 22             | 0.86***       | 1 ± 5     | 5 ± 9***   | 5                                  | −15, 24             | 1.06***       |
| Noodles                                    |           |            |                                    |                     |               |           |            |                                    |                     |               |
| Wheat noodles                              | 17 ± 34   | 33 ± 24*** | 16                                 | −61, 93             | −0.60***      | 26 ± 51   | 35 ± 27    | 9                                  | −97, 115            | −1.03***      |
| Chinese noodles                            | 18 ± 36   | 10 ± 12*   | −8                                 | −76, 59             | −1.33***      | 26 ± 45   | 20 ± 32    | −6                                 | −109, 97            | −0.60***      |
| Instant noodles                            | 13 ± 27   | 2 ± 6***   | −10                                | −58, 38             | −1.50***      | 30 ± 51   | 4 ± 9***   | −26                                | −120, 68            | −1.63***      |
| Spaghetti                                  | 15 ± 23   | 7 ± 9***   | −9                                 | −54, 36             | −1.26***      | 16 ± 31   | 7 ± 12***  | −10                                | −67, 47             | −1.18***      |
| Buckwheat noodles                          | 6 ± 19    | 4 ± 7      | −2                                 | −38, 34             | −1.26***      | 8 ± 23    | 4 ± 7      | −4                                 | −48, 41             | −1.47***      |
| Pulses and nuts                            |           |            |                                    |                     |               |           |            |                                    |                     |               |
| Soy milk                                   | 14 ± 41   | 1 ± 2***   | −13                                | −91, 65             | −1.90***      | 3 ± 14    | 0 ± 1      | −2                                 | −30, 25             | −1.93***      |
| Tofu (i.e., soybean curd)                  | 25 ± 26   | 31 ± 19*   | 6                                  | −51, 63             | −0.47**       | 31 ± 38   | 25 ± 18    | −5                                 | −74, 64             | −0.99***      |
| Natto (i.e., fermented soybeans)           | 8 ± 11    | 6 ± 6**    | −2                                 | −19, 14             | −0.64***      | 6 ± 11    | 5 ± 7*     | −2                                 | −19, 15             | −0.54***      |
| Tofu products                              | 4 ± 8     | 4 ± 4      | 0                                  | −15, 14             | −1.03***      | 6 ± 11    | 3 ± 4**    | −3                                 | −25, 18             | −1.47***      |
| Peanuts and nuts                           | 5 ± 12    | 0 ± 1***   | −5                                 | −29, 19             | −1.97***      | 5 ± 9     | 0 ± 1***   | −4                                 | −22, 13             | −1.88***      |
| All other pulses and nuts                  | 2 ± 5     | 0 ± 0***   | −2                                 | −12, 8              | −1.94***      | 2 ± 5     | 1 ± 1*     | −1                                 | −12, 9              | −1.84***      |
| Vegetables                                 |           |            |                                    |                     |               |           |            |                                    |                     |               |
| Edamame (i.e., immature soybeans) and peas | 3 ± 8     | 1 ± 2      | −1                                 | −18, 15             | −1.76***      | 2 ± 6     | 2 ± 2      | −1                                 | −12, 10             | −1.26***      |
| Seaweeds                                   | 6 ± 7     | 6 ± 5      | −1                                 | −17, 15             | −0.55***      | 7 ± 11    | 6 ± 7      | −1                                 | −25, 24             | −0.82***      |
| Pumpkins                                   | 7 ± 11    | 4 ± 4**    | −3                                 | −23, 17             | −1.18***      | 7 ± 13    | 3 ± 4***   | −4                                 | −27, 19             | −1.31***      |
| Mushrooms                                  | 13 ± 14   | 9 ± 7**    | −4                                 | −30, 22             | −1.00***      | 13 ± 13   | 8 ± 9***   | −6                                 | −31, 20             | −0.57***      |
| Cabbage                                    | 26 ± 25   | 18 ± 13*** | −9                                 | −61, 44             | −0.99***      | 35 ± 29   | 21 ± 19*** | −13                                | −73, 46             | −0.63***      |
| Cucumbers                                  | 13 ± 13   | 12 ± 8     | −1                                 | −31, 29             | −0.86***      | 12 ± 13   | 11 ± 9     | −1                                 | −28, 26             | −0.53***      |
| Bitter melon                               | 2 ± 7     | 1 ± 1**    | −2                                 | −14, 10             | −1.58***      | 2 ± 6     | 1 ± 2*     | −1                                 | −12, 9              | −1.40***      |
| Burdock                                    | 2 ± 5     | 1 ± 1***   | −2                                 | −11, 7              | −1.75***      | 4 ± 6     | 1 ± 1***   | −3                                 | −16, 9              | −1.92***      |
| Radishes                                   | 12 ± 15   | 8 ± 9*     | −3                                 | −32, 25             | −0.73***      | 12 ± 15   | 9 ± 10     | −3                                 | −38, 32             | −0.81***      |
| Onions                                     | 27 ± 21   | 27 ± 17    | −1                                 | −47, 46             | −0.29***      | 33 ± 37   | 28 ± 20    | −5                                 | −79, 69             | −0.92***      |
| Chinese cabbage                            | 3 ± 6     | 1 ± 3      | −1                                 | −14, 12             | −1.28***      | 3 ± 8     | 2 ± 5      | −1                                 | −17, 16             | −0.80***      |
| Tomatoes                                   | 16 ± 20   | 25 ± 18*** | 9                                  | −36, 54             | −0.18         | 18 ± 38   | 24 ± 22    | 6                                  | −73, 85             | −0.87***      |
| Eggplants                                  | 10 ± 19   | 9 ± 7      | −1                                 | −35, 33             | −1.20***      | 11 ± 23   | 8 ± 7      | −4                                 | −48, 41             | −1.48***      |
| Carrots                                    | 13 ± 14   | 15 ± 11    | 2                                  | −25, 29             | −0.32*        | 14 ± 15   | 16 ± 14    | 2                                  | −29, 32             | −0.08         |
| Green peppers                              | 5 ± 8     | 4 ± 3      | −1                                 | −16, 14             | −1.14***      | 7 ± 10    | 3 ± 3***   | −4                                 | −23, 15             | −1.39***      |
| Broccoli                                   | 4 ± 9     | 3 ± 3      | −2                                 | −18, 15             | −1.24***      | 5 ± 9     | 2 ± 3**    | −2                                 | −18, 14             | −1.19***      |

Table S6. Continued

| Tier 2 food group            | Women   |            |                                    |                     |               | Men     |            |                                    |                     |               |
|------------------------------|---------|------------|------------------------------------|---------------------|---------------|---------|------------|------------------------------------|---------------------|---------------|
|                              | DR      | Web MDHQ   | Bland–Altman analysis <sup>2</sup> |                     |               | DR      | Web MDHQ   | Bland–Altman analysis <sup>2</sup> |                     |               |
|                              |         |            | Mean difference                    | Limits of agreement | Slope of bias |         |            | Mean difference                    | Limits of agreement | Slope of bias |
| Green leafy vegetables       | 14 ± 19 | 16 ± 13    | 2                                  | –41, 44             | –0.64***      | 14 ± 15 | 12 ± 12    | –1                                 | –37, 34             | –0.32         |
| Bean sprouts                 | 10 ± 13 | 4 ± 4***   | –6                                 | –32, 19             | –1.53***      | 12 ± 16 | 4 ± 5***   | –8                                 | –36, 20             | –1.34***      |
| Lettuce                      | 7 ± 9   | 5 ± 5*     | –2                                 | –20, 16             | –0.91***      | 8 ± 18  | 5 ± 6      | –3                                 | –35, 30             | –1.32***      |
| All other vegetables         | 19 ± 19 | 1 ± 1***   | –18                                | –55, 19             | –1.97***      | 22 ± 21 | 2 ± 2***   | –20                                | –62, 21             | –2.02***      |
| Fruit                        |         |            |                                    |                     |               |         |            |                                    |                     |               |
| Strawberries                 | 0 ± 0   | 0 ± 1*     | 0                                  | –2, 3               | 1.94***       | 0 ± 0   | 0 ± 2*     | 0                                  | –3, 4               | 1.88***       |
| Persimmons                   | 0 ± 2   | 0 ± 1      | 0                                  | –5, 5               | –0.60**       | 1 ± 4   | 0 ± 0      | –1                                 | –8, 7               | –1.85***      |
| Citrus                       | 5 ± 13  | 10 ± 19*   | 4                                  | –39, 48             | 0.70***       | 3 ± 10  | 7 ± 16*    | 4                                  | –30, 39             | 0.83***       |
| Kiwi fruit                   | 2 ± 6   | 1 ± 3      | –1                                 | –9, 8               | –0.88***      | 2 ± 6   | 1 ± 2*     | –1                                 | –10, 8              | –1.24***      |
| Watermelon                   | 2 ± 10  | 1 ± 3      | –1                                 | –21, 19             | –1.76***      | 1 ± 6   | 1 ± 2      | 0                                  | –13, 12             | –1.72***      |
| Pears                        | 11 ± 20 | 6 ± 10*    | –5                                 | –44, 35             | –0.94***      | 10 ± 22 | 5 ± 10**   | –6                                 | –46, 35             | –1.05***      |
| Bananas                      | 12 ± 21 | 17 ± 27*   | 5                                  | –43, 53             | 0.33**        | 12 ± 26 | 14 ± 29    | 2                                  | –49, 54             | 0.16          |
| Grapes                       | 15 ± 31 | 6 ± 10**   | –9                                 | –64, 46             | –1.30***      | 12 ± 32 | 3 ± 7**    | –8                                 | –65, 48             | –1.50***      |
| Melon                        | 2 ± 15  | 1 ± 3      | –1                                 | –30, 28             | –1.81***      | 0 ± 1   | 1 ± 2**    | 1                                  | –4, 5               | 0.61***       |
| Peaches                      | 2 ± 9   | 3 ± 7      | 1                                  | –18, 20             | –0.48**       | 2 ± 11  | 1 ± 2      | –1                                 | –21, 19             | –1.70***      |
| Apples                       | 6 ± 15  | 6 ± 14     | 1                                  | –22, 24             | –0.07         | 4 ± 13  | 7 ± 18*    | 3                                  | –25, 30             | 0.35***       |
| All other fruit              | 10 ± 30 | 1 ± 1**    | –9                                 | –68, 50             | –2.00***      | 4 ± 10  | 2 ± 4**    | –3                                 | –25, 19             | –1.54***      |
| Fish and shellfish           |         |            |                                    |                     |               |         |            |                                    |                     |               |
| Oily fish                    | 12 ± 20 | 7 ± 7**    | –5                                 | –39, 30             | –1.18***      | 14 ± 19 | 9 ± 8**    | –5                                 | –43, 33             | –1.22***      |
| Red meat fish                | 5 ± 8   | 5 ± 5      | 0                                  | –17, 18             | –0.86***      | 5 ± 10  | 7 ± 6      | 2                                  | –21, 24             | –0.77***      |
| Squid and octopus            | 3 ± 5   | 1 ± 2*     | –1                                 | –11, 9              | –1.20***      | 4 ± 7   | 2 ± 3**    | –2                                 | –15, 11             | –1.24***      |
| Eel                          | 0 ± 2   | 0 ± 0      | 0                                  | –4, 3               | –1.92***      | 1 ± 4   | 0 ± 1      | –1                                 | –9, 7               | –1.98***      |
| Shrimp and crab              | 3 ± 5   | 1 ± 2**    | –1                                 | –12, 9              | –1.60***      | 4 ± 7   | 2 ± 3**    | –2                                 | –17, 13             | –1.49***      |
| Shellfish                    | 1 ± 3   | 1 ± 1      | 0                                  | –7, 6               | –1.24***      | 1 ± 3   | 1 ± 2      | 0                                  | –7, 7               | –0.94***      |
| Small fish with bones        | 1 ± 2   | 0 ± 1      | 0                                  | –3, 3               | –1.21***      | 1 ± 3   | 0 ± 1      | 0                                  | –5, 5               | –1.70***      |
| Fish eggs                    | 1 ± 2   | 0 ± 0**    | –1                                 | –5, 4               | –1.70***      | 1 ± 3   | 0 ± 0**    | –1                                 | –7, 5               | –1.96***      |
| Dried fish                   | 4 ± 10  | 2 ± 2*     | –2                                 | –22, 18             | –1.73***      | 5 ± 13  | 2 ± 4*     | –3                                 | –28, 22             | –1.62***      |
| Salmon                       | 8 ± 11  | 4 ± 4***   | –4                                 | –27, 19             | –1.40***      | 9 ± 13  | 6 ± 7*     | –4                                 | –33, 26             | –1.24***      |
| White meat fish              | 5 ± 11  | 4 ± 5      | –2                                 | –24, 20             | –1.24***      | 7 ± 13  | 5 ± 6      | –1                                 | –28, 25             | –1.22***      |
| Ground fish meat products    | 5 ± 7   | 5 ± 5      | 0                                  | –15, 16             | –0.71***      | 8 ± 14  | 5 ± 6*     | –3                                 | –32, 26             | –1.27***      |
| Canned tuna                  | 2 ± 3   | 1 ± 1**    | –1                                 | –7, 5               | –1.33***      | 2 ± 4   | 1 ± 2*     | –1                                 | –10, 8              | –1.09***      |
| All other fish and shellfish | 0 ± 0   | 0 ± 0      | 0                                  | 0, 0                | –1.73***      | 0 ± 1   | 0 ± 0      | 0                                  | –2, 2               | –1.99***      |
| Meat                         |         |            |                                    |                     |               |         |            |                                    |                     |               |
| Beef                         | 13 ± 17 | 7 ± 6***   | –5                                 | –38, 27             | –1.33***      | 17 ± 22 | 10 ± 8**   | –7                                 | –49, 35             | –1.35***      |
| Chicken                      | 30 ± 26 | 16 ± 10*** | –14                                | –66, 37             | –1.31***      | 46 ± 39 | 19 ± 11*** | –26                                | –104, 51            | –1.64***      |
| Processed meat               | 10 ± 10 | 10 ± 8     | 0                                  | –20, 20             | –0.36**       | 13 ± 13 | 13 ± 11    | 0                                  | –29, 29             | –0.30*        |
| Pork                         | 30 ± 25 | 26 ± 14    | –4                                 | –56, 48             | –0.95***      | 39 ± 27 | 29 ± 14*** | –10                                | –70, 50             | –1.14***      |

Table S6. Continued

| Tier 2 food group                           | Women    |            |                                    |                     |               | Men       |            |                                    |                     |               |
|---------------------------------------------|----------|------------|------------------------------------|---------------------|---------------|-----------|------------|------------------------------------|---------------------|---------------|
|                                             | DR       | Web MDHQ   | Bland–Altman analysis <sup>2</sup> |                     |               | DR        | Web MDHQ   | Bland–Altman analysis <sup>2</sup> |                     |               |
|                                             |          |            | Mean difference                    | Limits of agreement | Slope of bias |           |            | Mean difference                    | Limits of agreement | Slope of bias |
| Liver                                       | 0 ± 2    | 0 ± 0      | 0                                  | –5, 5               | –1.92***      | 1 ± 4     | 0 ± 0      | 0                                  | –8, 7               | –1.95***      |
| All other meat                              | 0 ± 1    | 0 ± 0      | 0                                  | –3, 3               | –2.00***      | 0 ± 3     | 0 ± 0      | 0                                  | –5, 5               | –2.00***      |
| Dairy products                              |          |            |                                    |                     |               |           |            |                                    |                     |               |
| Ice cream                                   | 6 ± 13   | 6 ± 15     | 0                                  | –34, 34             | 0.24          | 6 ± 14    | 5 ± 11     | –1                                 | –35, 34             | –0.38*        |
| Cheese                                      | 5 ± 7    | 5 ± 10     | 0                                  | –23, 23             | 0.79***       | 5 ± 7     | 4 ± 14     | –1                                 | –31, 30             | 1.23***       |
| Low-fat milk                                | 10 ± 35  | 5 ± 16     | –6                                 | –64, 53             | –0.95***      | 18 ± 77   | 7 ± 27     | –11                                | –127, 105           | –1.06***      |
| Yogurt                                      | 67 ± 93  | 38 ± 54*** | –29                                | –174, 115           | –0.65***      | 53 ± 85   | 28 ± 52*** | –25                                | –147, 97            | –0.57***      |
| Full-fat milk                               | 38 ± 56  | 56 ± 57**  | 18                                 | –98, 133            | 0.03          | 20 ± 42   | 25 ± 41    | 5                                  | –66, 77             | –0.04         |
| All other dairy products                    | 4 ± 11   | 1 ± 4*     | –3                                 | –25, 19             | –1.32***      | 5 ± 20    | 2 ± 7      | –3                                 | –43, 36             | –1.39***      |
| Confectioneries                             |          |            |                                    |                     |               |           |            |                                    |                     |               |
| Candies, caramels, and chewing gum          | 0 ± 2    | 1 ± 2      | 0                                  | –4, 4               | –0.04         | 0 ± 1     | 1 ± 2**    | 1                                  | –4, 6               | 1.54***       |
| Japanese bread with a sweet filling         | 3 ± 9    | 7 ± 10***  | 4                                  | –20, 28             | 0.15          | 8 ± 15    | 7 ± 15     | –1                                 | –38, 36             | 0.09          |
| Snacks made from wheat flour                | 1 ± 4    | 4 ± 8***   | 3                                  | –12, 18             | 1.01***       | 2 ± 8     | 4 ± 7**    | 3                                  | –15, 20             | –0.19         |
| Jellies                                     | 4 ± 11   | 1 ± 1***   | –3                                 | –24, 17             | –1.85***      | 4 ± 14    | 1 ± 2**    | –4                                 | –31, 24             | –1.91***      |
| Rice crackers                               | 2 ± 5    | 8 ± 11***  | 6                                  | –14, 26             | 1.12***       | 1 ± 4     | 9 ± 13***  | 7                                  | –18, 32             | 1.55***       |
| Chocolates                                  | 4 ± 6    | 12 ± 15*** | 8                                  | –20, 36             | 1.13***       | 3 ± 5     | 10 ± 16*** | 7                                  | –21, 36             | 1.33***       |
| Biscuits and cookies                        | 2 ± 4    | 4 ± 6***   | 2                                  | –10, 14             | 0.39*         | 1 ± 3     | 2 ± 4      | 1                                  | –8, 10              | 0.18          |
| Cakes                                       | 9 ± 17   | 16 ± 16*** | 7                                  | –34, 47             | –0.05         | 8 ± 17    | 14 ± 17**  | 6                                  | –31, 43             | 0.06          |
| Japanese sweets                             | 8 ± 14   | 10 ± 12    | 1                                  | –31, 34             | –0.25         | 7 ± 16    | 11 ± 20    | 3                                  | –44, 50             | 0.38*         |
| Alcoholic beverages                         |          |            |                                    |                     |               |           |            |                                    |                     |               |
| Beer                                        | 55 ± 140 | 61 ± 149   | 5                                  | –135, 146           | 0.07          | 174 ± 329 | 207 ± 332* | 33                                 | –288, 355           | 0.01          |
| Sake                                        | 1 ± 9    | 2 ± 14     | 1                                  | –11, 13             | 0.38***       | 8 ± 35    | 10 ± 39    | 3                                  | –63, 68             | 0.12          |
| Shochu (i.e., Japanese distilled beverages) | 23 ± 69  | 20 ± 63    | –4                                 | –112, 104           | –0.10         | 65 ± 153  | 64 ± 112   | –1                                 | –252, 250           | –0.39***      |
| Wine                                        | 10 ± 61  | 6 ± 20     | –3                                 | –101, 94            | –1.16***      | 6 ± 32    | 9 ± 51     | 3                                  | –99, 105            | 0.69***       |
| Whiskey and other spirits                   | 0 ± 0    | 0 ± 3      | 0                                  | –6, 7               | 2.00***       | 6 ± 27    | 6 ± 30     | 0                                  | –50, 49             | 0.11          |

<sup>1</sup> Values are means ± standard deviations. The values derived from the MDHQ were compared with those derived from the DR using the paired *t*-test: \* *p* < 0.05, \*\* *p* < 0.01, \*\*\* *p* < 0.001. <sup>2</sup> Mean difference was calculated as mean of difference between the two methods (MDHQ minus DR). Limits of agreement were calculated as the mean difference ± 1.96 standard deviation. Slope of bias (regression coefficient) was calculated by using a linear regression analysis, in which the difference between the two methods (MDHQ minus DR) was the dependent variable and the average of the two methods was the independent variable; positive values indicate that the difference increases as the average intake increases, while negative values indicate that the difference decreases as the average intake increases (\* *p* < 0.05, \*\* *p* < 0.01, \*\*\* *p* < 0.001).



**Table S7.** Median estimates of daily intakes of Tier 1 food groups (in grams per day) derived from the paper version of the Meal-based Diet History Questionnaire (MDHQ) in 111 Japanese women and 111 Japanese men, according to meal type <sup>1</sup>.

| Tier 1 food group                | Women            |                |                  |                  |                   | Men             |                |                  |                  |                   |
|----------------------------------|------------------|----------------|------------------|------------------|-------------------|-----------------|----------------|------------------|------------------|-------------------|
|                                  | Breakfast        | Lunch          | Dinner           | Snacks           | Overall diet      | Breakfast       | Lunch          | Dinner           | Snacks           | Overall diet      |
| Rice <sup>2</sup>                | 35 (0, 89)       | 82 (41, 104)   | 97 (39, 116)     | 0 (0, 0)**       | 220 (155, 258)    | 48 (11, 121)    | 122 (86, 173)  | 140 (83, 171)*   | 0 (0, 0)*        | 317 (255, 383)    |
| Bread <sup>2</sup>               | 19 (5, 45)       | 10 (0, 20)*    | 0 (0, 0)         | 0 (0, 0)**       | 38 (15, 56)       | 12 (0, 46)      | 6 (0, 13)*     | 0 (0, 0)         | 0 (0, 0)***      | 30 (11, 64)       |
| Noodles <sup>2</sup>             | 0 (0, 0)         | 25 (13, 50)*   | 10 (10, 21)*     | 0 (0, 0)         | 46 (29, 78)       | 0 (0, 0)        | 26 (13, 53)*** | 22 (0, 25)       | 0 (0, 0)         | 51 (34, 92)***    |
| Miso soup <sup>2</sup>           | 13 (0, 100)***   | 12 (0, 71)***  | 75 (13, 123)***  | 0 (0, 0)         | 140 (75, 217)***  | 13 (0, 100)     | 11 (0, 67)***  | 52 (13, 127)**   | 0 (0, 0)         | 146 (63, 231)***  |
| Potatoes <sup>2</sup>            | 3 (0, 6)*        | 5 (3, 6)*      | 14 (7, 21)       | 0 (0, 0)***      | 21 (13, 28)**     | 0 (0, 6)        | 3 (0, 5)***    | 8 (8, 17)**      | 0 (0, 0)***      | 19 (9, 28)***     |
| Pulses and nuts <sup>2</sup>     | 11 (0, 22)       | 6 (3, 11)      | 16 (8, 30)       | 0 (0, 0)***      | 39 (21, 58)*      | 3 (0, 16)*      | 3 (0, 11)      | 18 (9, 28)**     | 0 (0, 0)***      | 31 (18, 52)***    |
| Vegetables <sup>2</sup>          | 24 (6, 59)*      | 40 (13, 66)**  | 117 (75, 138)*** | 0 (0, 0)***      | 171 (122, 237)*** | 12 (0, 46)      | 40 (7, 64)***  | 116 (69, 154)*** | 0 (0, 0)***      | 177 (103, 240)*** |
| Pickled vegetables <sup>2</sup>  | 0 (0, 7)***      | 0 (0, 3)*      | 2 (0, 7)***      | 0 (0, 0)         | 5 (0, 13)***      | 0 (0, 4)***     | 2 (0, 9)**     | 3 (0, 10)***     | 0 (0, 0)         | 12 (2, 21)***     |
| Fruit                            | 11 (0, 34)       | 5 (0, 20)      | 6 (0, 23)**      | 12 (0, 25)***    | 62 (23, 102)      | 6 (0, 23)*      | 0 (0, 5)       | 6 (0, 22)        | 8 (0, 30)***     | 30 (12, 86)       |
| Fish and shellfish <sup>2</sup>  | 2 (0, 4)         | 6 (3, 13)**    | 19 (10, 27)***   | 0 (0, 0)**       | 29 (19, 40)***    | 2 (0, 5)        | 7 (4, 14)      | 26 (13, 37)***   | 0 (0, 0)**       | 40 (27, 55)***    |
| Meat <sup>2</sup>                | 7 (2, 13)        | 16 (10, 22)*** | 34 (25, 43)***   | 0 (0, 0)**       | 59 (43, 73)***    | 8 (2, 12)       | 21 (14, 30)*** | 41 (31, 53)***   | 0 (0, 0)**       | 72 (56, 88)***    |
| Eggs <sup>2</sup>                | 12 (0, 22)       | 8 (4, 12)*     | 7 (4, 10)*       | 0 (0, 0)***      | 28 (15, 38)**     | 12 (3, 25)      | 9 (2, 14)***   | 8 (4, 11)*       | 0 (0, 0)***      | 31 (17, 45)***    |
| Dairy products                   | 57 (18, 123)     | 6 (0, 24)      | 6 (0, 22)*       | 13 (0, 40)       | 112 (63, 180)     | 10 (0, 111)     | 0 (0, 7)       | 5 (0, 11)        | 0 (0, 13)**      | 43 (14, 134)***   |
| Confectioneries                  | 0 (0, 14)        | 4 (0, 8)       | 0 (0, 4)**       | 36 (18, 64)***   | 58 (32, 88)***    | 0 (0, 5)        | 0 (0, 5)       | 0 (0, 4)         | 23 (4, 54)***    | 39 (14, 73)***    |
| Fruit and vegetable juice        | 0 (0, 0)*        | 0 (0, 0)       | 0 (0, 0)*        | 0 (0, 21)***     | 0 (0, 42)***      | 0 (0, 0)***     | 0 (0, 0)       | 0 (0, 0)*        | 0 (0, 18)***     | 0 (0, 52)***      |
| Alcoholic beverages <sup>3</sup> | 0 (0, 0)***      | 0 (0, 0)***    | 0 (0, 43)**      | 0 (0, 0)         | 0 (0, 70)**       | 0 (0, 0)***     | 0 (0, 0)*      | 66 (0, 251)      | 0 (0, 75)        | 132 (0, 377)      |
| Soft drinks                      | 0 (0, 0)***      | 0 (0, 0)       | 0 (0, 0)         | 8 (0, 34)        | 16 (0, 48)        | 0 (0, 0)**      | 0 (0, 11)      | 0 (0, 0)*        | 12 (0, 61)       | 22 (0, 103)       |
| Green tea                        | 0 (0, 51)**      | 14 (0, 84)     | 0 (0, 84)        | 36 (0, 153)      | 94 (0, 375)       | 0 (0, 52)*      | 15 (0, 101)    | 0 (0, 56)        | 29 (0, 185)*     | 146 (0, 417)*     |
| Barley tea                       | 0 (0, 105)***    | 57 (0, 165)*** | 56 (0, 168)***   | 97 (0, 271)***   | 266 (0, 677)***   | 0 (0, 49)***    | 17 (0, 101)    | 0 (0, 146)***    | 31 (0, 222)***   | 146 (0, 528)***   |
| Oolong tea                       | 0 (0, 0)**       | 0 (0, 0)*      | 0 (0, 0)         | 0 (0, 0)***      | 0 (0, 15)***      | 0 (0, 0)***     | 0 (0, 0)       | 0 (0, 0)         | 0 (0, 17)**      | 0 (0, 17)***      |
| Black tea                        | 0 (0, 0)         | 0 (0, 0)       | 0 (0, 0)*        | 0 (0, 40)**      | 13 (0, 79)**      | 0 (0, 0)***     | 0 (0, 0)**     | 0 (0, 0)         | 0 (0, 16)*       | 0 (0, 17)**       |
| Coffee                           | 148 (15, 205)*** | 25 (0, 80)***  | 0 (0, 0)*        | 128 (49, 261)*** | 333 (171, 475)*** | 122 (0, 208)*** | 15 (0, 119)*** | 0 (0, 0)**       | 144 (15, 363)*** | 298 (137, 626)*** |
| Water                            | 26 (0, 171)***   | 28 (0, 117)*** | 28 (0, 174)***   | 156 (24, 355)*** | 366 (73, 619)***  | 0 (0, 170)***   | 17 (0, 153)*** | 15 (0, 188)***   | 106 (15, 309)*** | 272 (15, 652)***  |
| Breakfast cereals <sup>4</sup>   | 0 (0, 0)***      | 0 (0, 0)       | 0 (0, 0)         | 0 (0, 0)         | 0 (0, 0)**        | 0 (0, 0)**      | 0 (0, 0)       | 0 (0, 0)         | 0 (0, 0)         | 0 (0, 0)**        |

<sup>1</sup> Values are medians (25th and 75th percentiles). The values derived from the MDHQ were compared with those derived from the DR (shown in Table 2 for women and Table 3 for men) using the Wilcoxon signed-rank test: \*  $p < 0.05$ , \*\*  $p < 0.01$ , \*\*\*  $p < 0.001$ . <sup>2</sup> Not assessed for snacks in the MDHQ; the intake for snacks was 0 g/day for all participants. <sup>3</sup> Not assessed for breakfast in the MDHQ; the intake for breakfast was 0 g/day for all participants. <sup>4</sup> Only assessed for breakfast in the MDHQ; the intake for all other eating occasions was 0 g/day for all participants.

**Table S8.** Mean estimates of daily intakes of Tier 1 food groups (in grams per day) derived from the paper version of the Meal-based Diet History Questionnaire (MDHQ) in 111 Japanese women and 111 Japanese men, according to meal type <sup>1</sup>.

| Tier 1 food group                | Women       |            |             |              |              | Men         |            |             |             |              |
|----------------------------------|-------------|------------|-------------|--------------|--------------|-------------|------------|-------------|-------------|--------------|
|                                  | Breakfast   | Lunch      | Dinner      | Snacks       | Overall diet | Breakfast   | Lunch      | Dinner      | Snacks      | Overall diet |
| Rice <sup>2</sup>                | 46 ± 44     | 78 ± 38    | 84 ± 44     | 0 ± 0*       | 209 ± 81     | 64 ± 61     | 125 ± 59   | 124 ± 64*   | 0 ± 0       | 313 ± 104    |
| Bread <sup>2</sup>               | 25 ± 22     | 11 ± 12    | 1 ± 3       | 0 ± 0**      | 38 ± 25      | 25 ± 27     | 12 ± 17    | 1 ± 2       | 0 ± 0**     | 37 ± 32      |
| Noodles <sup>2</sup>             | 2 ± 6       | 39 ± 32**  | 17 ± 15     | 0 ± 0        | 58 ± 38      | 3 ± 7       | 38 ± 34*** | 21 ± 19     | 0 ± 0       | 62 ± 41***   |
| Miso soup <sup>2</sup>           | 50 ± 60***  | 36 ± 48*** | 70 ± 56***  | 0 ± 0        | 156 ± 106*** | 51 ± 62     | 32 ± 45*** | 70 ± 59*    | 0 ± 0       | 152 ± 110*** |
| Potatoes <sup>2</sup>            | 4 ± 6       | 5 ± 5***   | 14 ± 8*     | 0 ± 0*       | 23 ± 14***   | 4 ± 6       | 5 ± 5***   | 13 ± 9***   | 0 ± 0**     | 22 ± 16***   |
| Pulses and nuts <sup>2</sup>     | 13 ± 13     | 8 ± 9      | 21 ± 13     | 0 ± 0**      | 42 ± 26***   | 10 ± 13*    | 6 ± 7      | 21 ± 14***  | 0 ± 0***    | 36 ± 24***   |
| Vegetables <sup>2</sup>          | 33 ± 30     | 43 ± 31*** | 101 ± 43*** | 0 ± 0**      | 177 ± 80***  | 26 ± 29     | 39 ± 31*** | 105 ± 52*** | 0 ± 0       | 170 ± 87***  |
| Pickled vegetables <sup>2</sup>  | 3 ± 5***    | 3 ± 5      | 4 ± 5       | 0 ± 0        | 10 ± 13**    | 3 ± 6***    | 5 ± 6***   | 6 ± 6       | 0 ± 0       | 14 ± 14***   |
| Fruit                            | 21 ± 25*    | 11 ± 14    | 15 ± 19     | 20 ± 25**    | 67 ± 55      | 16 ± 23**   | 7 ± 11     | 13 ± 17     | 17 ± 23**   | 52 ± 49      |
| Fish and shellfish <sup>2</sup>  | 3 ± 5       | 8 ± 7**    | 21 ± 12***  | 0 ± 0        | 32 ± 18***   | 4 ± 5       | 10 ± 8*    | 27 ± 13***  | 0 ± 0*      | 41 ± 20***   |
| Meat <sup>2</sup>                | 7 ± 7       | 16 ± 11*** | 35 ± 14***  | 0 ± 0*       | 58 ± 23***   | 9 ± 8       | 22 ± 12*** | 42 ± 15***  | 0 ± 0**     | 73 ± 24***   |
| Eggs <sup>2</sup>                | 13 ± 11     | 9 ± 6**    | 7 ± 5**     | 0 ± 0**      | 29 ± 15***   | 15 ± 14     | 10 ± 8***  | 8 ± 6**     | 0 ± 0**     | 33 ± 19***   |
| Dairy products                   | 67 ± 49     | 19 ± 25    | 12 ± 15     | 28 ± 39*     | 126 ± 89     | 43 ± 53     | 10 ± 19    | 10 ± 15     | 13 ± 27**   | 76 ± 77***   |
| Confectioneries                  | 7 ± 12      | 8 ± 13     | 4 ± 8*      | 44 ± 32***   | 64 ± 45***   | 6 ± 14      | 5 ± 10     | 4 ± 10      | 32 ± 32***  | 48 ± 42**    |
| Fruit and vegetable juice        | 9 ± 25*     | 5 ± 14     | 4 ± 15*     | 15 ± 30**    | 33 ± 58**    | 16 ± 49*    | 7 ± 22     | 7 ± 32*     | 21 ± 47***  | 50 ± 87***   |
| Alcoholic beverages <sup>3</sup> | 0 ± 0**     | 1 ± 9      | 54 ± 125*   | 22 ± 77      | 77 ± 165     | 0 ± 0       | 10 ± 33    | 177 ± 255   | 81 ± 168    | 268 ± 353    |
| Soft drinks                      | 6 ± 19**    | 6 ± 18     | 4 ± 16      | 25 ± 40      | 41 ± 75      | 7 ± 22*     | 13 ± 32    | 8 ± 23      | 52 ± 85     | 80 ± 126     |
| Green tea                        | 40 ± 64**   | 49 ± 66    | 49 ± 74     | 100 ± 142    | 238 ± 301*   | 37 ± 65     | 58 ± 77    | 37 ± 68     | 117 ± 162   | 249 ± 310    |
| Barley tea                       | 51 ± 68***  | 76 ± 78*** | 79 ± 83**   | 160 ± 174**  | 365 ± 362*** | 37 ± 65**   | 65 ± 84    | 66 ± 86*    | 139 ± 188*  | 306 ± 359**  |
| Oolong tea                       | 7 ± 29*     | 13 ± 41*   | 10 ± 34     | 29 ± 80**    | 59 ± 163**   | 12 ± 38**   | 12 ± 41    | 15 ± 49     | 45 ± 126*   | 83 ± 236*    |
| Black tea                        | 16 ± 42     | 12 ± 34    | 6 ± 23*     | 39 ± 74*     | 74 ± 146**   | 11 ± 37**   | 7 ± 27*    | 4 ± 24      | 29 ± 92     | 51 ± 157*    |
| Coffee                           | 119 ± 88*** | 54 ± 65*** | 16 ± 43*    | 170 ± 152*** | 359 ± 263*** | 110 ± 91*** | 62 ± 79*** | 19 ± 47**   | 207 ± 200** | 398 ± 324*** |
| Water                            | 73 ± 78***  | 66 ± 79*** | 69 ± 83***  | 208 ± 193*   | 416 ± 377*** | 58 ± 81***  | 71 ± 89*** | 78 ± 91***  | 197 ± 219   | 404 ± 411*** |
| Breakfast cereals <sup>4</sup>   | 3 ± 10***   | 0 ± 0      | 0 ± 0       | 0 ± 0        | 3 ± 10*      | 3 ± 11*     | 0 ± 0      | 0 ± 0       | 0 ± 0       | 3 ± 11*      |

<sup>1</sup> Values are means ± standard deviations. The values derived from the MDHQ were compared with those derived from the DR (shown in Table S2 for women and Table S3 for men) using the paired *t*-test: \* *p* <0.05, \*\* *p* <0.01, \*\*\* *p* <0.001. <sup>2</sup> Not assessed for snacks in the MDHQ; the intake for snacks was 0 g/day for all participants. <sup>3</sup> Not assessed for breakfast in the MDHQ; the intake for breakfast was 0 g/day for all participants. <sup>4</sup> Only assessed for breakfast in the MDHQ; the intake for all other eating occasions was 0 g/day for all participants.

**Table S9.** Spearman correlation coefficients between estimates of daily intakes of Tier 1 food groups (in grams per day) derived from the 4-day weighed dietary record and those derived from the paper version of the Meal-based Diet History Questionnaire (MDHQ) in 111 Japanese women and 111 Japanese men, according to meal type <sup>1</sup>.

| Tier 1 food group                | Women     |         |         |         |              | Men       |         |         |         |              |
|----------------------------------|-----------|---------|---------|---------|--------------|-----------|---------|---------|---------|--------------|
|                                  | Breakfast | Lunch   | Dinner  | Snacks  | Overall diet | Breakfast | Lunch   | Dinner  | Snacks  | Overall diet |
| Rice <sup>2</sup>                | 0.84***   | 0.49*** | 0.65*** | —       | 0.65***      | 0.81***   | 0.64*** | 0.63*** | —       | 0.55***      |
| Bread <sup>2</sup>               | 0.66***   | 0.31*** | 0.13    | —       | 0.61***      | 0.74***   | 0.64*** | 0.29**  | —       | 0.63***      |
| Noodles <sup>2</sup>             | 0.22*     | 0.42*** | 0.23*   | —       | 0.28**       | 0.42***   | 0.48*** | 0.12    | —       | 0.31**       |
| Miso soup <sup>2</sup>           | 0.79***   | 0.41*** | 0.78*** | —       | 0.70***      | 0.77***   | 0.37*** | 0.76*** | —       | 0.73***      |
| Potatoes <sup>2</sup>            | 0.43***   | 0.12    | 0.14    | —       | 0.17         | 0.41***   | 0.23*   | 0.08    | —       | 0.22*        |
| Pulses and nuts <sup>2</sup>     | 0.65***   | 0.40*** | 0.13    | —       | 0.49***      | 0.70***   | 0.22*   | 0.27**  | —       | 0.46***      |
| Vegetables <sup>2</sup>          | 0.69***   | 0.36*** | 0.29**  | —       | 0.43***      | 0.67***   | 0.44*** | 0.24*   | —       | 0.48***      |
| Pickled vegetables <sup>2</sup>  | 0.42***   | 0.35*** | 0.20*   | —       | 0.43***      | 0.30**    | 0.28**  | 0.20*   | —       | 0.34***      |
| Fruit                            | 0.66***   | 0.53*** | 0.46*** | 0.45*** | 0.70***      | 0.65***   | 0.34*** | 0.27**  | 0.39*** | 0.64***      |
| Fish and shellfish <sup>2</sup>  | 0.57***   | 0.34*** | 0.27**  | —       | 0.32***      | 0.39***   | 0.24*   | 0.20*   | —       | 0.33***      |
| Meat <sup>2</sup>                | 0.58***   | 0.37*** | 0.27**  | —       | 0.34***      | 0.53***   | 0.39*** | 0.17    | —       | 0.26**       |
| Eggs <sup>2</sup>                | 0.50***   | 0.25**  | 0.30**  | —       | 0.42***      | 0.70***   | 0.48*** | 0.39*** | —       | 0.59***      |
| Dairy products                   | 0.77***   | 0.22*   | 0.33*** | 0.54*** | 0.69***      | 0.69***   | 0.31*** | 0.38*** | 0.23*   | 0.70***      |
| Confectioneries                  | 0.30**    | 0.25**  | 0.37*** | 0.50*** | 0.46***      | 0.39***   | 0.40*** | 0.02    | 0.53*** | 0.52***      |
| Fruit and vegetable juice        | 0.36***   | 0.17    | 0.37*** | 0.35*** | 0.49***      | 0.58***   | 0.32*** | 0.25**  | 0.29**  | 0.47***      |
| Alcoholic beverages <sup>3</sup> | —         | 0.04    | 0.73*** | 0.48*** | 0.76***      | —         | 0.08    | 0.73*** | 0.64*** | 0.83***      |
| Soft drinks                      | -0.03     | 0.32*** | 0.07    | 0.38*** | 0.44***      | 0.19*     | 0.12    | 0.22*   | 0.45*** | 0.43***      |
| Green tea                        | 0.57***   | 0.58*** | 0.57*** | 0.53*** | 0.70***      | 0.65***   | 0.51*** | 0.53*** | 0.65*** | 0.70***      |
| Barley tea                       | 0.63***   | 0.67*** | 0.73*** | 0.71*** | 0.79***      | 0.66***   | 0.58*** | 0.68*** | 0.63*** | 0.73***      |
| Oolong tea                       | -0.03     | 0.39*** | 0.50*** | 0.38*** | 0.53***      | 0.46***   | 0.66*** | 0.54*** | 0.45*** | 0.42***      |
| Black tea                        | 0.74***   | 0.63*** | 0.33*** | 0.55*** | 0.70***      | 0.59***   | 0.60*** | 0.34*** | 0.34*** | 0.43***      |
| Coffee                           | 0.71***   | 0.52*** | 0.50*** | 0.73*** | 0.76***      | 0.75***   | 0.60*** | 0.47*** | 0.75*** | 0.77***      |
| Water                            | 0.35***   | 0.33*** | 0.17    | 0.63*** | 0.64***      | 0.27**    | 0.31*** | 0.36*** | 0.69*** | 0.63***      |
| Breakfast cereals <sup>4</sup>   | 0.68***   | —       | —       | —       | 0.67***      | 0.52***   | —       | —       | —       | 0.44***      |

<sup>1</sup> Values are Spearman correlation coefficients. \*  $p < 0.05$ , \*\*  $p < 0.01$ , \*\*\*  $p < 0.001$ . <sup>2</sup> Not assessed for snacks in the MDHQ; the intake for snacks was 0 g/day for all participants. <sup>3</sup> Not assessed for breakfast in the MDHQ; the intake for breakfast was 0 g/day for all participants. <sup>4</sup> Only assessed for breakfast in the MDHQ; the intake for all other eating occasions was 0 g/day for all participants.

**Table S10.** Bland–Altman analysis for estimates of daily intakes of Tier 1 food groups (in grams per day) derived from the 4-day weighed dietary record (DR) and those derived from the paper version of the Meal-based Diet History Questionnaire (MDHQ) in 111 Japanese women, according to meal type <sup>1</sup>.

| Tier 1 food group                | Breakfast       |                     |               | Lunch           |                     |               | Dinner          |                     |               | Snacks          |                     |               | Overall diet    |                     |               |
|----------------------------------|-----------------|---------------------|---------------|-----------------|---------------------|---------------|-----------------|---------------------|---------------|-----------------|---------------------|---------------|-----------------|---------------------|---------------|
|                                  | Mean difference | Limits of agreement | Slope of bias | Mean difference | Limits of agreement | Slope of bias | Mean difference | Limits of agreement | Slope of bias | Mean difference | Limits of agreement | Slope of bias | Mean difference | Limits of agreement | Slope of bias |
| Rice <sup>2</sup>                | 1               | −80, 82             | −0.38***      | 2               | −90, 95             | −0.40***      | −2              | −80, 77             | −0.29***      | −1              | −9, 7               | ---           | 0               | −153, 154           | −0.36***      |
| Bread <sup>2</sup>               | 2               | −38, 41             | −0.22*        | 2               | −31, 35             | −0.55***      | 0               | −9, 9               | −0.77***      | −1              | −8, 6               | ---           | 2               | −51, 55             | −0.25*        |
| Noodles <sup>2</sup>             | 0               | −26, 25             | −1.01***      | −15             | −116, 86            | −0.75***      | 4               | −46, 54             | −0.76***      | 0               | −3, 3               | ---           | −11             | −130, 108           | −0.68***      |
| Miso soup <sup>2</sup>           | 14              | −51, 80             | 0.04          | 19              | −63, 100            | 0.42***       | 16              | −60, 92             | −0.02         | 0               | −7, 6               | ---           | 49              | −95, 193            | 0.23**        |
| Potatoes <sup>2</sup>            | 1               | −11, 13             | 0.05          | −5              | −34, 24             | −1.52***      | −4              | −39, 31             | −1.23***      | −1              | −8, 6               | ---           | −9              | −59, 41             | −0.89***      |
| Pulses and nuts <sup>2</sup>     | −4              | −55, 47             | −1.01***      | −2              | −43, 38             | −1.20***      | −5              | −62, 52             | −1.13***      | −5              | −37, 27             | ---           | −16             | −110, 77            | −0.93***      |
| Vegetables <sup>2</sup>          | 5               | −57, 67             | −0.29**       | −16             | −103, 71            | −0.53***      | −23             | −143, 97            | −0.47***      | −2              | −17, 13             | ---           | −37             | −234, 161           | −0.41***      |
| Pickled vegetables               | 2               | −7, 11              | 0.49***       | 1               | −9, 11              | 0.14          | 1               | −17, 19             | −0.70***      | 0               | 0, 0                | ---           | 4               | −21, 29             | 0.08          |
| Fruit                            | −6              | −61, 49             | −0.46***      | −4              | −52, 43             | −0.82***      | 3               | −33, 40             | −0.06         | 6               | −41, 54             | −0.15         | 0               | −106, 106           | −0.23*        |
| Fish and shellfish <sup>2</sup>  | −2              | −21, 17             | −0.96***      | −4              | −35, 26             | −1.04***      | −9              | −50, 32             | −0.87***      | 0               | −6, 5               | ---           | −16             | −72, 41             | −0.78***      |
| Meat <sup>2</sup>                | 1               | −18, 19             | −0.58***      | −9              | −45, 28             | −0.84***      | −17             | −74, 41             | −1.06***      | 0               | −4, 4               | ---           | −26             | −98, 47             | −0.73***      |
| Eggs <sup>2</sup>                | 0               | −26, 26             | −0.43***      | −3              | −27, 20             | −0.90***      | −3              | −22, 17             | −1.07***      | −1              | −5, 4               | ---           | −7              | −47, 33             | −0.48***      |
| Dairy products                   | 3               | −105, 111           | −0.52***      | −2              | −76, 72             | −0.70***      | 3               | −28, 34             | −0.02         | −8              | −91, 74             | −0.39***      | −5              | −187, 177           | −0.31**       |
| Confectioneries                  | 1               | −29, 32             | −0.26         | −1              | −37, 36             | −0.25         | 2               | −14, 17             | 0.46***       | 27              | −32, 85             | 0.76***       | 29              | −47, 106            | 0.51***       |
| Fruit and vegetable juice        | 5               | −37, 47             | 0.27**        | 0               | −38, 37             | −0.59***      | 2               | −19, 24             | 0.58***       | 9               | −48, 67             | 0.25*         | 16              | −85, 118            | 0.47***       |
| Alcoholic beverages <sup>3</sup> | 0               | −1, 1               | ---           | 1               | −17, 18             | 1.93***       | −19             | −181, 143           | −0.32***      | 4               | −118, 126           | 0.14          | −15             | −211, 182           | −0.21***      |
| Soft drinks                      | 5               | −35, 45             | 1.47***       | 0               | −34, 35             | −0.26**       | 1               | −44, 46             | −0.01         | −8              | −121, 104           | −0.49***      | −2              | −158, 155           | 0.18          |
| Green tea                        | 16              | −89, 121            | 0.20*         | 7               | −110, 124           | 0.20          | 10              | −111, 131           | 0.01          | 19              | −271, 309           | −0.12         | 51              | −441, 543           | 0.21*         |
| Barley tea                       | 23              | −105, 151           | −0.03         | 30              | −100, 159           | 0.05          | 24              | −121, 168           | −0.15         | 45              | −299, 388           | −0.22*        | 121             | −418, 659           | −0.04         |
| Oolong tea                       | 7               | −50, 64             | 1.99***       | 9               | −67, 84             | 1.09***       | 4               | −51, 58             | −0.06         | 17              | −120, 155           | 0.57***       | 36              | −236, 308           | 0.83***       |
| Black tea                        | 3               | −43, 49             | 0.00          | 3               | −51, 57             | 0.37***       | 4               | −30, 38             | 0.42***       | 14              | −117, 145           | 0.14          | 24              | −152, 200           | 0.39***       |
| Coffee                           | 34              | −109, 177           | −0.10         | 26              | −94, 145            | 0.30**        | 9               | −66, 84             | 0.9***        | 54              | −154, 263           | 0.19*         | 123             | −220, 466           | 0.30***       |
| Water                            | 55              | −85, 195            | 0.98***       | 57              | −91, 205            | 1.46***       | 61              | −102, 224           | 1.66***       | 53              | −395, 500           | −0.44***      | 225             | −395, 846           | 0.31**        |
| Breakfast cereals <sup>4</sup>   | 2               | −10, 15             | 0.81***       | 0               | −4, 3               | ---           | 0               | −5, 5               | ---           | 0               | 0, 0                | ---           | 2               | −12, 16             | 0.68***       |

<sup>1</sup> Mean difference was calculated as mean of difference between the two methods (MDHQ minus DR). Limits of agreement were calculated as the mean difference  $\pm$  1.96 standard deviation. Slope of bias (regression coefficient) was calculated by using a linear regression analysis, in which the difference between the two methods (MDHQ minus DR) was the dependent variable and the average of the two methods was the independent variable; positive values indicate that the difference increases as the average intake increases, while negative values indicate that the difference decreases as the average intake increases (\*  $p < 0.05$ , \*\*  $p < 0.01$ , \*\*\*  $p < 0.001$ ). For the food groups the intake of which was not assessed in the MDHQ and thus the intake value was 0 g/day for all participants, the slope of bias was not calculated. <sup>2</sup> Not assessed for snacks in the MDHQ. <sup>3</sup> Not assessed for breakfast in the MDHQ. <sup>4</sup> Only assessed for breakfast in the MDHQ.

**Table S11.** Bland–Altman analysis for estimates of daily intakes of Tier 1 food groups (in grams per day) derived from the 4-day weighed dietary record (DR) and those derived from the paper version of the Meal-based Diet History Questionnaire (MDHQ) in 111 Japanese men, according to meal type <sup>1</sup>.

| Tier 1 food group                | Breakfast       |                     |               | Lunch           |                     |               | Dinner          |                     |               | Snacks          |                     |               | Overall diet    |                     |               |
|----------------------------------|-----------------|---------------------|---------------|-----------------|---------------------|---------------|-----------------|---------------------|---------------|-----------------|---------------------|---------------|-----------------|---------------------|---------------|
|                                  | Mean difference | Limits of agreement | Slope of bias | Mean difference | Limits of agreement | Slope of bias | Mean difference | Limits of agreement | Slope of bias | Mean difference | Limits of agreement | Slope of bias | Mean difference | Limits of agreement | Slope of bias |
| Rice <sup>2</sup>                | 2               | −81, 84             | −0.19**       | 4               | −119, 126           | −0.35***      | −14             | −139, 112           | −0.37***      | 0               | −5, 4               | ---           | −9              | −240, 222           | −0.39***      |
| Bread <sup>2</sup>               | 1               | −39, 41             | −0.08         | 3               | −37, 43             | −0.06         | −1              | −9, 8               | −1.05***      | −2              | −14, 10             | ---           | 2               | −55, 58             | −0.06         |
| Noodles <sup>2</sup>             | −1              | −37, 34             | −1.21***      | −43             | −174, 88            | −0.99***      | 1               | −75, 77             | −1.02***      | −1              | −9, 8               | ---           | −44             | −205, 117           | −1.02***      |
| Miso soup <sup>2</sup>           | 6               | −75, 87             | −0.08         | 17              | −74, 109            | 0.58***       | 10              | −79, 98             | −0.17*        | 0               | 0, 0                | ---           | 34              | −133, 200           | 0.09          |
| Potatoes <sup>2</sup>            | 0               | −16, 16             | −0.35*        | −6              | −34, 22             | −1.38***      | −9              | −59, 42             | −1.50***      | −1              | −4, 3               | ---           | −15             | −80, 50             | −1.08***      |
| Pulses and nuts <sup>2</sup>     | −4              | −48, 40             | −0.86***      | 0               | −28, 27             | −1.09***      | −10             | −63, 43             | −0.92***      | −1              | −8, 6               | ---           | −16             | −98, 66             | −0.87***      |
| Vegetables <sup>2</sup>          | −6              | −76, 64             | −0.59***      | −17             | −94, 60             | −0.33**       | −47             | −206, 111           | −0.60***      | −2              | −21, 17             | ---           | −72             | −289, 146           | −0.42***      |
| Pickled vegetables               | 2               | −10, 14             | 0.58***       | 2               | −11, 15             | 0.34*         | 2               | −20, 25             | −0.80***      | 0               | −3, 2               | ---           | 6               | −30, 42             | −0.08         |
| Fruit                            | −8              | −62, 46             | −0.60***      | −2              | −40, 35             | −0.85***      | 3               | −34, 40             | 0.06          | 7               | −50, 64             | −0.50***      | 0               | −101, 102           | −0.29**       |
| Fish and shellfish <sup>2</sup>  | −1              | −21, 18             | −0.90***      | −3              | −35, 29             | −0.96***      | −15             | −78, 47             | −1.22***      | −1              | −11, 9              | ---           | −21             | −95, 53             | −0.94***      |
| Meat <sup>2</sup>                | −2              | −29, 25             | −0.80***      | −10             | −51, 31             | −0.83***      | −30             | −111, 52            | −1.45***      | −1              | −5, 4               | ---           | −42             | −137, 53            | −1.03***      |
| Eggs <sup>2</sup>                | −2              | −28, 24             | −0.32***      | −6              | −31, 19             | −0.79***      | −3              | −25, 19             | −0.95***      | −1              | −5, 4               | ---           | −12             | −53, 29             | −0.37***      |
| Dairy products                   | −11             | −128, 106           | −0.55***      | −5              | −63, 54             | −0.79***      | −4              | −50, 43             | −0.77***      | −12             | −94, 70             | −0.74***      | −31             | −203, 141           | −0.53***      |
| Confectioneries                  | −3              | −41, 35             | −0.40**       | −2              | −37, 33             | −0.74***      | 1               | −23, 26             | 0.27          | 17              | −40, 74             | 0.54***       | 13              | −72, 99             | 0.26*         |
| Fruit and vegetable juice        | 8               | −60, 76             | 0.42***       | 2               | −35, 40             | 0.31**        | 3               | −27, 33             | 0.05          | 17              | −73, 106            | 0.78***       | 30              | −98, 157            | 0.28***       |
| Alcoholic beverages <sup>3</sup> | −1              | −7, 5               | ---           | 0               | −62, 61             | −0.41***      | 2               | −357, 362           | −0.19**       | 4               | −234, 242           | −0.23***      | 6               | −340, 352           | −0.12*        |
| Soft drinks                      | 5               | −44, 53             | 0.94***       | 3               | −89, 94             | −0.50***      | 0               | −115, 116           | −1.35***      | −19             | −259, 221           | −0.65***      | −11             | −355, 332           | −0.56***      |
| Green tea                        | 7               | −82, 96             | −0.10         | 11              | −143, 164           | 0.12          | 7               | −115, 129           | −0.02         | 21              | −277, 318           | −0.11         | 45              | −428, 518           | 0.10          |
| Barley tea                       | 14              | −90, 117            | 0.28**        | 0               | −197, 197           | −0.44***      | 19              | −135, 174           | −0.01         | 33              | −302, 368           | −0.19*        | 66              | −453, 585           | 0.02          |
| Oolong tea                       | 9               | −53, 72             | 1.10***       | 2               | −61, 66             | 0.05          | 4               | −73, 81             | −0.07         | 21              | −186, 227           | 0.16          | 37              | −270, 344           | 0.23**        |
| Black tea                        | 7               | −49, 63             | 0.96***       | 5               | −38, 47             | 0.99***       | 2               | −33, 36             | 0.67***       | 13              | −163, 189           | 0.79***       | 27              | −227, 281           | 0.99***       |
| Coffee                           | 28              | −126, 182           | −0.09         | 35              | −88, 159            | 0.61***       | 11              | −66, 89             | 0.62***       | 44              | −284, 371           | −0.10         | 118             | −328, 564           | 0.20*         |
| Water                            | 39              | −112, 190           | 0.89***       | 53              | −110, 216           | 0.97***       | 66              | −102, 234           | 1.08***       | 16              | −621, 653           | −0.72***      | 175             | −541, 891           | −0.05         |
| Breakfast cereals <sup>4</sup>   | 2               | −14, 18             | 0.86***       | 0               | 0, 0                | ---           | 0               | 0, 0                | ---           | 0               | 0, 0                | ---           | 2               | −14, 17             | 0.87***       |

<sup>1</sup> Mean difference was calculated as mean of difference between the two methods (MDHQ minus DR). Limits of agreement were calculated as the mean difference  $\pm$  1.96 standard deviation. Slope of bias (regression coefficient) was calculated by using a linear regression analysis, in which the difference between the two methods (MDHQ minus DR) was the dependent variable and the average of the two methods was the independent variable; positive values indicate that the difference increases as the average intake increases, while negative values indicate that the difference decreases as the average intake increases (\*  $p < 0.05$ , \*\*  $p < 0.01$ , \*\*\*  $p < 0.001$ ). For the food groups the intake of which was not assessed in the MDHQ and thus the intake value was 0 g/day for all participants, the slope of bias was not calculated. <sup>2</sup> Not assessed for snacks in the MDHQ. <sup>3</sup> Not assessed for breakfast in the MDHQ. <sup>4</sup> Only assessed for breakfast in the MDHQ.

**Table S12.** Estimates of overall intakes of Tier 2 food groups (in grams per day) derived from the 4-day weighed dietary record (DR) and those derived from the paper version of the Meal-based Diet History Questionnaire (MDHQ), Spearman correlation coefficients, and Bland–Altman analysis in 111 Japanese women and 111 Japanese men <sup>1</sup>.

| Tier 2 food group                          | Women                             |                          |                           |                                    |                        |                  | Men                  |                          |              |                                    |                        |                  |
|--------------------------------------------|-----------------------------------|--------------------------|---------------------------|------------------------------------|------------------------|------------------|----------------------|--------------------------|--------------|------------------------------------|------------------------|------------------|
|                                            | Median<br>(P25, P75) <sup>1</sup> | Correlation <sup>2</sup> | Mean<br>± SD <sup>3</sup> | Bland–Altman analysis <sup>4</sup> |                        |                  | Median<br>(P25, P75) | Correlation <sup>2</sup> | Mean<br>± SD | Bland–Altman analysis <sup>2</sup> |                        |                  |
|                                            |                                   |                          |                           | Mean<br>difference                 | Limits of<br>agreement | Slope of<br>bias |                      |                          |              | Mean<br>difference                 | Limits of<br>agreement | Slope of<br>bias |
| Rice                                       |                                   |                          |                           |                                    |                        |                  |                      |                          |              |                                    |                        |                  |
| White rice                                 | 211 (147, 252)                    | 0.62***                  | 199 ± 80                  | −7                                 | −167, 153              | −0.37***         | 301 (240, 375)       | 0.57***                  | 297 ± 107*   | −23                                | −252, 206              | −0.37***         |
| Brown rice                                 | 0 (0, 7)***                       | 0.37***                  | 10 ± 33**                 | 7                                  | −48, 62                | 0.75***          | 0 (0, 7)***          | 0.39***                  | 16 ± 43***   | 14                                 | −58, 87                | 1.23***          |
| Bread                                      |                                   |                          |                           |                                    |                        |                  |                      |                          |              |                                    |                        |                  |
| White bread                                | 29 (12, 46)                       | 0.57***                  | 31 ± 21                   | −4                                 | −57, 49                | −0.47***         | 27 (7, 52)           | 0.58***                  | 33 ± 28      | −2                                 | −62, 57                | −0.23*           |
| Wholegrain bread                           | 5 (0, 12)***                      | 0.10                     | 7 ± 8***                  | 6                                  | −11, 23                | 0.89***          | 0 (0, 4)***          | −0.09                    | 4 ± 12**     | 4                                  | −21, 29                | 1.47***          |
| Noodles                                    |                                   |                          |                           |                                    |                        |                  |                      |                          |              |                                    |                        |                  |
| Wheat noodles                              | 25 (12, 41)***                    | 0.19*                    | 30 ± 23***                | 13                                 | −63, 89                | −0.65***         | 25 (11, 38)**        | 0.25**                   | 28 ± 25      | 2                                  | −104, 108              | −1.12***         |
| Chinese noodles                            | 7 (1, 16)                         | 0.30**                   | 11 ± 13*                  | −7                                 | −74, 59                | −1.25***         | 12 (3, 23)           | 0.33***                  | 17 ± 19*     | −9                                 | −96, 79                | −1.18***         |
| Instant noodles                            | 0 (0, 4)*                         | 0.38***                  | 4 ± 11***                 | −8                                 | −56, 40                | −1.06***         | 3 (0, 6)             | 0.46***                  | 5 ± 10***    | −25                                | −119, 70               | −1.61***         |
| Spaghetti                                  | 6 (1, 10)                         | 0.17                     | 8 ± 12**                  | −7                                 | −54, 39                | −0.96***         | 5 (1, 9)             | 0.26**                   | 7 ± 11**     | −9                                 | −66, 48                | −1.28***         |
| Buckwheat noodles                          | 1 (0, 7)***                       | 0.35***                  | 5 ± 8                     | −1                                 | −36, 34                | −1.05***         | 1 (0, 6)***          | 0.28**                   | 4 ± 7        | −4                                 | −46, 39                | −1.42***         |
| Pulses and nuts                            |                                   |                          |                           |                                    |                        |                  |                      |                          |              |                                    |                        |                  |
| Soy milk                                   | 0 (0, 0)                          | 0.56***                  | 1 ± 3***                  | −13                                | −91, 65                | −1.86***         | 0 (0, 0)             | 0.40***                  | 0 ± 1        | −2                                 | −30, 25                | −1.87***         |
| Tofu (i.e., soybean curd)                  | 27 (15, 45)**                     | 0.39***                  | 31 ± 20*                  | 6                                  | −47, 59                | −0.40**          | 24 (13, 36)          | 0.43***                  | 27 ± 18      | −4                                 | −71, 63                | −0.94***         |
| Natto (i.e., fermented soybeans)           | 4 (1, 8)*                         | 0.53***                  | 6 ± 6**                   | −2                                 | −19, 15                | −0.68***         | 2 (0, 6)             | 0.66***                  | 5 ± 10       | −1                                 | −16, 14                | −0.06            |
| Tofu products                              | 3 (1, 6)*                         | 0.31***                  | 4 ± 4                     | 0                                  | −15, 15                | −1.02***         | 2 (0, 6)             | 0.28**                   | 3 ± 4*       | −3                                 | −25, 19                | −1.40***         |
| Peanuts and nuts                           | 0 (0, 0)***                       | 0.28**                   | 0 ± 0***                  | −5                                 | −29, 19                | −1.94***         | 0 (0, 0)***          | 0.37***                  | 0 ± 1***     | −5                                 | −22, 13                | −1.85***         |
| All other pulses and nuts                  | 0 (0, 0)                          | 0.18                     | 0 ± 0***                  | −2                                 | −12, 8                 | −1.97***         | 0 (0, 0)             | 0.11                     | 1 ± 1*       | −1                                 | −12, 9                 | −1.86***         |
| Vegetables                                 |                                   |                          |                           |                                    |                        |                  |                      |                          |              |                                    |                        |                  |
| Edamame (i.e., immature soybeans) and peas | 0 (0, 2)                          | 0.24**                   | 1 ± 2                     | −1                                 | −17, 15                | −1.70***         | 0 (0, 2)             | 0.33***                  | 2 ± 2        | −1                                 | −11, 10                | −1.12***         |
| Seaweeds                                   | 5 (2, 9)                          | 0.20*                    | 7 ± 6                     | 0                                  | −17, 17                | −0.38*           | 4 (1, 8)             | 0.33***                  | 6 ± 6        | −1                                 | −22, 21                | −0.84***         |
| Pumpkins                                   | 3 (0, 5)                          | 0.41***                  | 4 ± 4**                   | −3                                 | −23, 17                | −1.18***         | 3 (0, 5)             | 0.48***                  | 4 ± 4***     | −4                                 | −27, 19                | −1.23***         |
| Mushrooms                                  | 7 (3, 14)*                        | 0.45***                  | 10 ± 8**                  | −3                                 | −27, 21                | −0.72***         | 7 (2, 13)***         | 0.46***                  | 9 ± 7***     | −5                                 | −28, 18                | −0.74***         |
| Cabbage                                    | 16 (10, 29)*                      | 0.39***                  | 20 ± 14**                 | −7                                 | −53, 40                | −0.82***         | 17 (8, 29)***        | 0.37***                  | 22 ± 19***   | −13                                | −70, 45                | −0.62***         |
| Cucumbers                                  | 10 (5, 17)                        | 0.50***                  | 11 ± 8                    | −2                                 | −27, 23                | −0.76***         | 9 (5, 16)            | 0.49***                  | 11 ± 8       | −2                                 | −25, 22                | −0.61***         |
| Bitter melon                               | 0 (0, 1)                          | 0.46***                  | 1 ± 2**                   | −2                                 | −14, 10                | −1.44***         | 0 (0, 1)             | 0.53***                  | 1 ± 2*       | −1                                 | −11, 9                 | −1.33***         |
| Burdock                                    | 0 (0, 1)**                        | 0.43***                  | 1 ± 1***                  | −2                                 | −10, 7                 | −1.64***         | 0 (0, 2)***          | 0.25**                   | 1 ± 1***     | −3                                 | −15, 9                 | −1.72***         |
| Radishes                                   | 9 (2, 16)                         | 0.39***                  | 11 ± 11                   | −1                                 | −31, 30                | −0.48***         | 9 (2, 17)            | 0.23*                    | 11 ± 11      | −1                                 | −34, 32                | −0.57***         |
| Onions                                     | 27 (15, 40)                       | 0.19*                    | 29 ± 20                   | 2                                  | −49, 53                | −0.11            | 23 (12, 39)          | 0.22*                    | 26 ± 19      | −7                                 | −80, 67                | −1.01***         |
| Chinese cabbage                            | 1 (0, 2)                          | 0.38***                  | 2 ± 3                     | −1                                 | −13, 11                | −1.02***         | 1 (0, 4)*            | 0.20*                    | 3 ± 5        | 0                                  | −16, 16                | −0.72***         |
| Tomatoes                                   | 18 (6, 36)***                     | 0.49***                  | 21 ± 17**                 | 5                                  | −34, 45                | −0.22            | 17 (4, 30)*          | 0.39***                  | 19 ± 16      | 1                                  | −70, 72                | −1.12***         |
| Eggplants                                  | 6 (3, 11)                         | 0.47***                  | 8 ± 6                     | −2                                 | −33, 29                | −1.20***         | 6 (2, 10)            | 0.50***                  | 7 ± 6*       | −4                                 | −45, 37                | −1.37***         |
| Carrots                                    | 15 (9, 26)***                     | 0.51***                  | 18 ± 13***                | 5                                  | −22, 31                | −0.09            | 14 (4, 22)           | 0.40***                  | 16 ± 14      | 2                                  | −29, 33                | −0.04            |
| Green peppers                              | 3 (1, 6)                          | 0.44***                  | 4 ± 3*                    | −2                                 | −16, 12                | −1.19***         | 3 (1, 5)**           | 0.41***                  | 4 ± 3***     | −3                                 | −21, 14                | −1.30***         |
| Broccoli                                   | 2 (0, 4)                          | 0.43***                  | 3 ± 3                     | −2                                 | −18, 15                | −1.26***         | 2 (0, 4)             | 0.47***                  | 2 ± 3**      | −2                                 | −18, 14                | −1.24***         |

Table S12. Continued

| Tier 2 food group            | Women                             |                          |                           |                                    |                        |                  | Men                  |                          |              |                                    |                        |                  |
|------------------------------|-----------------------------------|--------------------------|---------------------------|------------------------------------|------------------------|------------------|----------------------|--------------------------|--------------|------------------------------------|------------------------|------------------|
|                              | Median<br>(P25, P75) <sup>1</sup> | Correlation <sup>2</sup> | Mean<br>± SD <sup>3</sup> | Bland–Altman analysis <sup>4</sup> |                        |                  | Median<br>(P25, P75) | Correlation <sup>2</sup> | Mean<br>± SD | Bland–Altman analysis <sup>2</sup> |                        |                  |
|                              |                                   |                          |                           | Mean<br>difference                 | Limits of<br>agreement | Slope of<br>bias |                      |                          |              | Mean<br>difference                 | Limits of<br>agreement | Slope of<br>bias |
| Green leafy vegetables       | 15 (5, 26)**                      | 0.44***                  | 17 ± 14                   | 2                                  | −40, 45                | −0.59***         | 14 (3, 22)           | 0.23*                    | 16 ± 14      | 2                                  | −35, 40                | −1.24            |
| Bean sprouts                 | 4 (2, 6)***                       | 0.37***                  | 4 ± 4***                  | −6                                 | −31, 19                | −1.43***         | 4 (1, 7)***          | 0.34***                  | 5 ± 5***     | −8                                 | −36, 20                | −1.30***         |
| Lettuce                      | 4 (1, 7)                          | 0.45***                  | 5 ± 5*                    | −2                                 | −19, 15                | −0.91***         | 4 (1, 8)             | 0.46***                  | 6 ± 6        | −2                                 | −35, 30                | −1.27***         |
| All other vegetables         | 1 (1, 2)***                       | 0.02                     | 1 ± 1***                  | −18                                | −55, 20                | −2.00***         | 1 (1, 2)***          | 0.03                     | 1 ± 1***     | −20                                | −62, 21                | −2.00***         |
| Fruit                        |                                   |                          |                           |                                    |                        |                  |                      |                          |              |                                    |                        |                  |
| Strawberries                 | 0 (0, 0)**                        | −0.01                    | 0 ± 1                     | 0                                  | −2, 2                  | 1.87***          | 0 (0, 0)**           | −0.05                    | 1 ± 2*       | 0                                  | −3, 4                  | 1.92***          |
| Persimmons                   | 0 (0, 0)**                        | 0.34***                  | 1 ± 2                     | 0                                  | −5, 5                  | 0.10             | 0 (0, 0)             | 0.37***                  | 1 ± 4        | 0                                  | −9, 10                 | −0.12**          |
| Citrus                       | 4 (0, 13)***                      | 0.14                     | 11 ± 19***                | 6                                  | −25, 36                | 0.48***          | 0 (0, 9)***          | 0.24*                    | 8 ± 13***    | 5                                  | −20, 29                | 0.45***          |
| Kiwi fruit                   | 0 (0, 2)                          | 0.51***                  | 1 ± 3                     | 0                                  | −10, 9                 | −0.74***         | 0 (0, 1)             | 0.50***                  | 1 ± 2*       | −1                                 | −10, 8                 | −1.13***         |
| Watermelon                   | 0 (0, 2)***                       | 0.17                     | 1 ± 3                     | 0                                  | −21, 20                | −1.60***         | 0 (0, 1)***          | 0.15                     | 1 ± 2        | 0                                  | −13, 12                | −1.60***         |
| Pears                        | 5 (1, 13)                         | 0.54***                  | 11 ± 15                   | −1                                 | −38, 36                | −0.37**          | 1 (0, 9)             | 0.48***                  | 7 ± 12       | −4                                 | −44, 37                | −0.87***         |
| Bananas                      | 5 (0, 22)***                      | 0.65***                  | 16 ± 24*                  | 4                                  | −37, 45                | 0.16             | 1 (0, 13)            | 0.65***                  | 14 ± 27      | 1                                  | −40, 42                | 0.03             |
| Grapes                       | 3 (1, 9)                          | 0.45***                  | 9 ± 15*                   | −7                                 | −59, 46                | −0.92***         | 1 (0, 8)             | 0.49***                  | 7 ± 15       | −5                                 | −61, 51                | −0.94***         |
| Melon                        | 0 (0, 0)***                       | 0.22*                    | 1 ± 2                     | −1                                 | −30, 27                | −1.90***         | 0 (0, 0)***          | 0.13                     | 1 ± 2*       | 1                                  | −4, 5                  | 0.87***          |
| Peaches                      | 0 (0, 1)**                        | 0.09                     | 1 ± 3                     | −1                                 | −18, 17                | −1.44***         | 0 (0, 0)             | 0.23*                    | 1 ± 3        | −1                                 | −22, 20                | −1.54***         |
| Apples                       | 3 (0, 18)***                      | 0.46***                  | 12 ± 19***                | 6                                  | −25, 36                | 0.28**           | 0 (0, 12)***         | 0.44***                  | 9 ± 19***    | 5                                  | −22, 31                | 0.42***          |
| All other fruit              | 1 (0, 1)                          | 0.15                     | 1 ± 1**                   | −9                                 | −68, 50                | −1.98***         | 1 (0, 2)             | 0.06                     | 2 ± 4        | −2                                 | −25, 21                | −1.46***         |
| Fish and shellfish           |                                   |                          |                           |                                    |                        |                  |                      |                          |              |                                    |                        |                  |
| Oily fish                    | 6 (1, 11)                         | 0.19*                    | 7 ± 6*                    | −4                                 | −42, 34                | −1.45***         | 8 (2, 13)*           | 0.29**                   | 8 ± 7**      | −6                                 | −42, 31                | −1.31***         |
| Red meat fish                | 3 (1, 6)                          | 0.08                     | 4 ± 4                     | −1                                 | −17, 16                | −1.06***         | 5 (1, 9)*            | 0.16                     | 6 ± 6        | 1                                  | −21, 23                | −0.78***         |
| Squid and octopus            | 0 (0, 2)                          | 0.28**                   | 1 ± 2*                    | −1                                 | −11, 9                 | −1.42***         | 1 (0, 4)             | 0.37***                  | 2 ± 3**      | −2                                 | −15, 12                | −1.28***         |
| Eel                          | 0 (0, 0)***                       | 0.24*                    | 0 ± 0                     | 0                                  | −3, 3                  | −1.81***         | 0 (0, 0)***          | 0.26**                   | 0 ± 1        | −1                                 | −9, 7                  | −1.84***         |
| Shrimp and crab              | 0 (0, 2)                          | 0.06                     | 1 ± 2**                   | −1                                 | −11, 9                 | −1.55***         | 1 (0, 3)             | 0.08                     | 2 ± 3        | −2                                 | −17, 13                | −1.21***         |
| Shellfish                    | 0 (0, 2)                          | 0.13                     | 1 ± 1                     | 0                                  | −7, 6                  | −1.34***         | 0 (0, 2)*            | 0.24*                    | 1 ± 2        | 0                                  | −7, 7                  | −0.99***         |
| Small fish with bones        | 0 (0, 1)**                        | 0.26**                   | 1 ± 1                     | 0                                  | −4, 3                  | −0.55***         | 0 (0, 0)**           | 0.33***                  | 0 ± 1        | 0                                  | −5, 5                  | −1.58***         |
| Fish eggs                    | 0 (0, 0)                          | 0.25**                   | 0 ± 1**                   | −1                                 | −6, 4                  | −1.68***         | 0 (0, 0)             | 0.31***                  | 0 ± 0**      | −1                                 | −7, 5                  | −1.90***         |
| Dried fish                   | 1 (0, 3)                          | 0.28**                   | 2 ± 3                     | −2                                 | −21, 18                | −1.50***         | 1 (0, 4)             | 0.24*                    | 3 ± 4*       | −3                                 | −27, 22                | −1.44***         |
| Salmon                       | 3 (1, 5)*                         | 0.29**                   | 4 ± 5***                  | −4                                 | −26, 19                | −1.22***         | 4 (1, 8)*            | 0.15                     | 5 ± 4***     | −5                                 | −31, 22                | −1.49***         |
| White meat fish              | 1 (1, 7)                          | 0.27**                   | 4 ± 5                     | −1                                 | −23, 21                | −1.19***         | 5 (1, 10)            | 0.22*                    | 6 ± 6        | −1                                 | −26, 25                | −1.18***         |
| Ground fish meat products    | 4 (1, 7)*                         | 0.26**                   | 5 ± 5                     | 0                                  | −15, 16                | −0.68***         | 5 (1, 8)             | 0.34***                  | 6 ± 6        | −2                                 | −30, 26                | −1.13***         |
| Canned tuna                  | 1 (0, 1)                          | 0.39***                  | 1 ± 1**                   | −1                                 | −7, 5                  | −1.31***         | 0 (0, 1)             | 0.24*                    | 1 ± 3*       | −1                                 | −10, 8                 | −0.76***         |
| All other fish and shellfish | 0 (0, 0)***                       | 0.10                     | 0 ± 0                     | 0                                  | 0, 0                   | −1.81***         | 0 (0, 0)***          | −0.15                    | 0 ± 0        | 0                                  | −2, 2                  | −2.00***         |
| Meat                         |                                   |                          |                           |                                    |                        |                  |                      |                          |              |                                    |                        |                  |
| Beef                         | 6 (1, 9)**                        | 0.21*                    | 7 ± 6***                  | −6                                 | −38, 27                | −1.42***         | 11 (5, 15)           | 0.16                     | 11 ± 9*      | −5                                 | −50, 40                | −1.42***         |
| Chicken                      | 17 (11, 22)***                    | 0.34***                  | 17 ± 8***                 | −14                                | −62, 34                | −1.38***         | 18 (13, 26)***       | 0.17                     | 20 ± 9***    | −26                                | −103, 50               | −1.69***         |
| Processed meat               | 8 (4, 14)                         | 0.40***                  | 10 ± 8                    | 0                                  | −21, 20                | −0.40**          | 11 (6, 20)           | 0.29**                   | 14 ± 11      | 0                                  | −29, 29                | −0.36*           |
| Pork                         | 25 (18, 31)*                      | 0.33***                  | 25 ± 12*                  | −5                                 | −52, 41                | −1.02***         | 27 (20, 38)***       | 0.06                     | 29 ± 13***   | −10                                | −69, 49                | −1.27***         |

Table S12. Continued

| Tier 2 food group                           | Women                             |                          |                           |                                    |                        |                  | Men                  |                          |              |                                    |                        |                  |
|---------------------------------------------|-----------------------------------|--------------------------|---------------------------|------------------------------------|------------------------|------------------|----------------------|--------------------------|--------------|------------------------------------|------------------------|------------------|
|                                             | Median<br>(P25, P75) <sup>1</sup> | Correlation <sup>2</sup> | Mean<br>± SD <sup>3</sup> | Bland–Altman analysis <sup>4</sup> |                        |                  | Median<br>(P25, P75) | Correlation <sup>2</sup> | Mean<br>± SD | Bland–Altman analysis <sup>2</sup> |                        |                  |
|                                             |                                   |                          |                           | Mean<br>difference                 | Limits of<br>agreement | Slope of<br>bias |                      |                          |              | Mean<br>difference                 | Limits of<br>agreement | Slope of<br>bias |
| Liver                                       | 0 (0, 0)***                       | 0.18                     | 0 ± 0                     | 0                                  | –5, 5                  | –1.92***         | 0 (0, 0)***          | 0.21*                    | 0 ± 0        | 0                                  | –8, 7                  | –1.92***         |
| All other meat                              | 0 (0, 0)***                       | 0.01                     | 0 ± 0                     | 0                                  | –3, 3                  | –2.00***         | 0 (0, 0)***          | –0.12                    | 0 ± 0        | 0                                  | –5, 5                  | –2.00***         |
| Dairy products                              |                                   |                          |                           |                                    |                        |                  |                      |                          |              |                                    |                        |                  |
| Ice cream                                   | 1 (0, 4)                          | 0.36***                  | 4 ± 8                     | –2                                 | –28, 24                | –0.77***         | 1 (0, 4)             | 0.30**                   | 3 ± 5        | –3                                 | –31, 25                | –1.34            |
| Cheese                                      | 1 (0, 4)**                        | 0.25**                   | 4 ± 10                    | –1                                 | –24, 21                | 0.77***          | 1 (0, 4)*            | 0.21*                    | 3 ± 6*       | –2                                 | –18, 14                | –0.21            |
| Low-fat milk                                | 0 (0, 0)                          | 0.51***                  | 5 ± 17*                   | –5                                 | –54, 44                | –0.77***         | 0 (0, 0)             | 0.62***                  | 9 ± 31       | –9                                 | –123, 105              | –0.95***         |
| Yogurt                                      | 19 (1, 59)**                      | 0.60***                  | 44 ± 63**                 | –24                                | –178, 131              | –0.50***         | 2 (0, 17)***         | 0.64***                  | 27 ± 53***   | –26                                | –144, 93               | –0.53***         |
| Full-fat milk                               | 60 (14, 107)***                   | 0.61***                  | 68 ± 60***                | 30                                 | –88, 148               | 0.08             | 7 (0, 57)***         | 0.56***                  | 32 ± 45**    | 12                                 | –72, 95                | 0.09             |
| All other dairy products                    | 0 (0, 1)                          | –0.08                    | 1 ± 2**                   | –3                                 | –24, 18                | –1.87***         | 0 (0, 1)             | –0.03                    | 2 ± 4        | –4                                 | –43, 36                | –1.83***         |
| Confectioneries                             |                                   |                          |                           |                                    |                        |                  |                      |                          |              |                                    |                        |                  |
| Candies, caramels, and chewing gum          | 0 (0, 1)***                       | 0.20*                    | 1 ± 1                     | 0                                  | –4, 4                  | –0.48**          | 0 (0, 0)***          | 0.28**                   | 1 ± 2***     | 1                                  | –3, 4                  | 1.12***          |
| Japanese bread with a sweet filling         | 3 (1, 8)***                       | 0.24*                    | 6 ± 7*                    | 3                                  | –18, 23                | –0.38*           | 1 (0, 6)             | 0.37***                  | 7 ± 13       | –1                                 | –34, 32                | –0.13            |
| Snacks made from wheat flour                | 1 (0, 4)***                       | 0.46***                  | 3 ± 4***                  | 2                                  | –7, 10                 | 0.04             | 1 (0, 4)***          | 0.34***                  | 3 ± 5        | 1                                  | –11, 13                | –0.55***         |
| Jellies                                     | 0 (0, 1)***                       | 0.13                     | 1 ± 2**                   | –3                                 | –24, 18                | –1.92***         | 0 (0, 0)***          | 0.16                     | 0 ± 1**      | –4                                 | –31, 23                | –1.94***         |
| Rice crackers                               | 5 (1, 10)***                      | 0.43***                  | 7 ± 9***                  | 5                                  | –10, 21                | 0.86***          | 3 (0, 9)***          | 0.46***                  | 7 ± 11***    | 5                                  | –14, 25                | 1.31***          |
| Chocolates                                  | 7 (2, 16)***                      | 0.43***                  | 12 ± 16***                | 8                                  | –21, 37                | 1.16***          | 2 (0, 14)***         | 0.41***                  | 9 ± 13***    | 6                                  | –16, 28                | 1.13***          |
| Biscuits and cookies                        | 2 (0, 6)***                       | 0.35***                  | 4 ± 5***                  | 2                                  | –8, 12                 | 0.05             | 0 (0, 4)***          | 0.39***                  | 2 ± 4*       | 1                                  | –7, 9                  | 0.15             |
| Cakes                                       | 14 (3, 26)***                     | 0.42***                  | 18 ± 19***                | 9                                  | –31, 49                | 0.20             | 6 (1, 18)***         | 0.31**                   | 12 ± 16*     | 4                                  | –34, 42                | –0.07            |
| Japanese sweets                             | 8 (2, 19)**                       | 0.23*                    | 12 ± 14*                  | 4                                  | –29, 37                | –0.03            | 2 (0, 12)*           | 0.52***                  | 7 ± 11       | 0                                  | –31, 31                | –0.54***         |
| Alcoholic beverages                         |                                   |                          |                           |                                    |                        |                  |                      |                          |              |                                    |                        |                  |
| Beer                                        | 0 (0, 25)                         | 0.78***                  | 50 ± 127                  | –6                                 | –110, 99               | –0.10*           | 50 (0, 206)          | 0.80***                  | 185 ± 307    | 11                                 | –250, 272              | –0.07            |
| Sake                                        | 0 (0, 0)                          | 0.64***                  | 2 ± 13                    | 1                                  | –9, 10                 | 0.32***          | 0 (0, 0)             | 0.60***                  | 9 ± 27       | 2                                  | –41, 45                | –0.30***         |
| Shochu (i.e., Japanese distilled beverages) | 0 (0, 0)                          | 0.70***                  | 20 ± 66                   | –4                                 | –98, 90                | –0.05            | 2 (0, 67)            | 0.72***                  | 62 ± 108     | –3                                 | –210, 204              | –0.40***         |
| Wine                                        | 0 (0, 0)                          | 0.48***                  | 6 ± 22                    | –3                                 | –90, 83                | –1.00***         | 0 (0, 0)             | 0.58***                  | 5 ± 20       | –1                                 | –34, 32                | –0.48***         |
| Whiskey and other spirits                   | 0 (0, 0)                          | — <sup>5</sup>           | 0 ± 2                     | 0                                  | –3, 3                  | 2.00***          | 0 (0, 0)             | 0.90***                  | 7 ± 31       | 1                                  | –39, 40                | 0.16*            |

P25, 25th percentile; P75, 75th percentile; SD, standard deviation. <sup>1</sup> The values derived from the MDHQ were compared with those derived from the DR (shown in Table 5) using the Wilcoxon signed-rank test: \*  $p < 0.05$ , \*\*  $p < 0.01$ , \*\*\*  $p < 0.001$ . <sup>2</sup> Spearman correlation coefficients: \*  $p < 0.05$ , \*\*  $p < 0.01$ , \*\*\*  $p < 0.001$ . <sup>3</sup> The values derived from the MDHQ were compared with those derived from DR (shown in Table S6) using the paired  $t$ -test: \*  $p < 0.05$ , \*\*  $p < 0.01$ , \*\*\*  $p < 0.001$ . <sup>4</sup> Mean difference was calculated as mean of difference between the two methods (MDHQ minus DR). Limits of agreement were calculated as the mean difference  $\pm$  1.96 SD. Slope of bias (regression coefficient) was calculated by using a linear regression analysis, in which the difference between the two methods (MDHQ minus DR) was the dependent variable and the average of the two methods was the independent variable; positive values indicate that the difference increases as the average intake increases, while negative values indicate that the difference decreases as the average intake increases (\*  $p < 0.05$ , \*\*  $p < 0.01$ , \*\*\*  $p < 0.001$ ). <sup>5</sup> Not available because the intake derived from the DR was 0 g/day for all participants.
